# Supplementary material for: Synthesis of cyclically constrained sugar derived α/β- and α/γ-peptides
Source: Royal Society of Chemistry journal article supplement (doi:10.1039/c2ob26992a), 2012-11-14
Supplement: c2ob26992a.pdf [file c2ob26992a.pdf]

## Synthesis of cyclically constrained sugar derived $\alpha/\beta$ - and $\alpha/\gamma$ -peptides

Antonio Franconetti, Sorel Jatunov, Pastora Borrachero, Manuel Gómez-Guillén, and  
Francisca Cabrera-Escribano\*

Departamento de Química Orgánica, Facultad de Química, Universidad de Sevilla, C/ Profesor  
García González 1, 41012 Sevilla, Spain, Tel: +34954556868, Fax: +34954624960  
E-mail: fcabrera@us.es

### SUPPORTING INFORMATION

| CONTENTS                                                                                                                                                                                               | Page |
|--------------------------------------------------------------------------------------------------------------------------------------------------------------------------------------------------------|------|
| (1R and 1S)-2,5-Anhydro-3-azido-4,6- <i>O</i> -benzylidene-3-deoxy-1-fluoro-1- <i>O</i> -methyl-D-altritol ( <b>9a</b> , <b>9b</b> ), $^1\text{H}$ NMR                                                 | S2   |
| (1R)-2,5-Anhydro-3-azido-4,6- <i>O</i> -benzylidene-3-deoxy-1-fluoro-1- <i>O</i> -methyl-D-altritol ( <b>9a</b> ), $^1\text{H}$ NMR and $^{13}\text{C}$ NMR                                            | S3   |
| (1S)-2,5-Anhydro-3-azido-4,6- <i>O</i> -benzylidene-3-deoxy-1-fluoro-1- <i>O</i> -methyl-altritol ( <b>9b</b> ), $^1\text{H}$ NMR and $^{13}\text{C}$ NMR                                              | S5   |
| 2,5-Anhydro-3-azido-3-deoxy- <i>aldehydo</i> -D-altrose dimethylacetal ( <b>10</b> ), $^1\text{H}$ NMR and $^{13}\text{C}$ NMR                                                                         | S7   |
| 4,6-Di- <i>O</i> -acetyl-2,5-anhydro-3-azido-3-deoxy- <i>aldehydo</i> -D-altrose dimethylacetal ( <b>11</b> ), $^1\text{H}$ NMR and $^{13}\text{C}$ NMR                                                | S9   |
| 4,6-Di- <i>O</i> -acetyl-2,5-anhydro-3-azido-3-deoxy-D-altronic acid ( <b>12</b> ), $^1\text{H}$ NMR and $^{13}\text{C}$ NMR                                                                           | S11  |
| 4,6-Di- <i>O</i> -acetyl-2,5-anhydro-3-azido-3-deoxy- <i>N</i> -(ethoxycarbonyl-methyl)- $\alpha$ -D-altruronamide ( <b>13</b> ), $^1\text{H}$ NMR and $^{13}\text{C}$ NMR                             | S13  |
| 2,5-Anhydro-3-azido-6- <i>O</i> -benzyl-3-deoxy-1- <i>O</i> -methyl-D-altritol ( <b>14</b> ), $^1\text{H}$ NMR and $^{13}\text{C}$ NMR                                                                 | S15  |
| 2,5-Anhydro-3-amino-6- <i>O</i> -benzyl-3-deoxy-1- <i>O</i> -methyl-D-altritol ( <b>15</b> ), $^1\text{H}$ NMR and $^{13}\text{C}$ NMR                                                                 | S17  |
| 2,5-Anhydro-3- <i>N</i> -(tercbutoxycarbonylamino-6- <i>O</i> -benzyl-3-deoxy-1- <i>O</i> -methyl-D-altritol ( <b>16</b> ), $^1\text{H}$ NMR and $^{13}\text{C}$ NMR                                   | S19  |
| 4,6-Di- <i>O</i> -acetyl-2,5-anhydro-3-azido-3-deoxy-D-altrose ( <b>17</b> ), $^1\text{H}$ NMR and $^{13}\text{C}$ NMR                                                                                 | S21  |
| 4,6-Di- <i>O</i> -acetyl-2,5-anhydro-3-azido-3-deoxy-D-altritol ( <b>18</b> ), $^1\text{H}$ NMR and $^{13}\text{C}$ NMR                                                                                | S23  |
| Methyl 3-azido-2,4di- <i>O</i> -acetyl-3-deoxy- $\alpha$ -D-allopyranosiduronic acid ( <b>21</b> ), $^1\text{H}$ NMR and $^{13}\text{C}$ NMR                                                           | S25  |
| Methyl 3-azido-2- <i>O</i> -benzoyl-3-deoxy- $\alpha$ -D-allopyranoside ( <b>24</b> ), $^1\text{H}$ NMR and $^{13}\text{C}$ NMR                                                                        | S27  |
| Ethyl [methyl 3-azido-2- <i>O</i> -benzoyl-3-deoxy- $\alpha$ -D-allopyranosiduronyl]-glycinate ( <b>26</b> ), $^1\text{H}$ NMR and $^{13}\text{C}$ NMR                                                 | S29  |
| Methyl (methyl 3-azido-2- <i>O</i> -benzoyl-3-deoxy- $\alpha$ -D-allopyranosid) uronate ( <b>28</b> ), $^1\text{H}$ NMR and $^{13}\text{C}$ NMR                                                        | S31  |
| Methyl [methyl 2- <i>O</i> -benzoyl-3-( <i>N</i> - <i>tert</i> -butoxycarbonyl-glycylamido)-3-deoxy- $\alpha$ -D-allopyranosid]uronate ( <b>30</b> ), $^1\text{H}$ NMR and $^{13}\text{C}$ NMR         | S33  |
| Ethyl [methyl 2- <i>O</i> -benzoyl-3-( <i>N</i> - <i>tert</i> -butoxycarbonyl-glycylamido)-3-deoxy- $\alpha$ -D-allopyranosid]uronyl-glycinate ( <b>31</b> ), $^1\text{H}$ NMR and $^{13}\text{C}$ NMR | S35  |

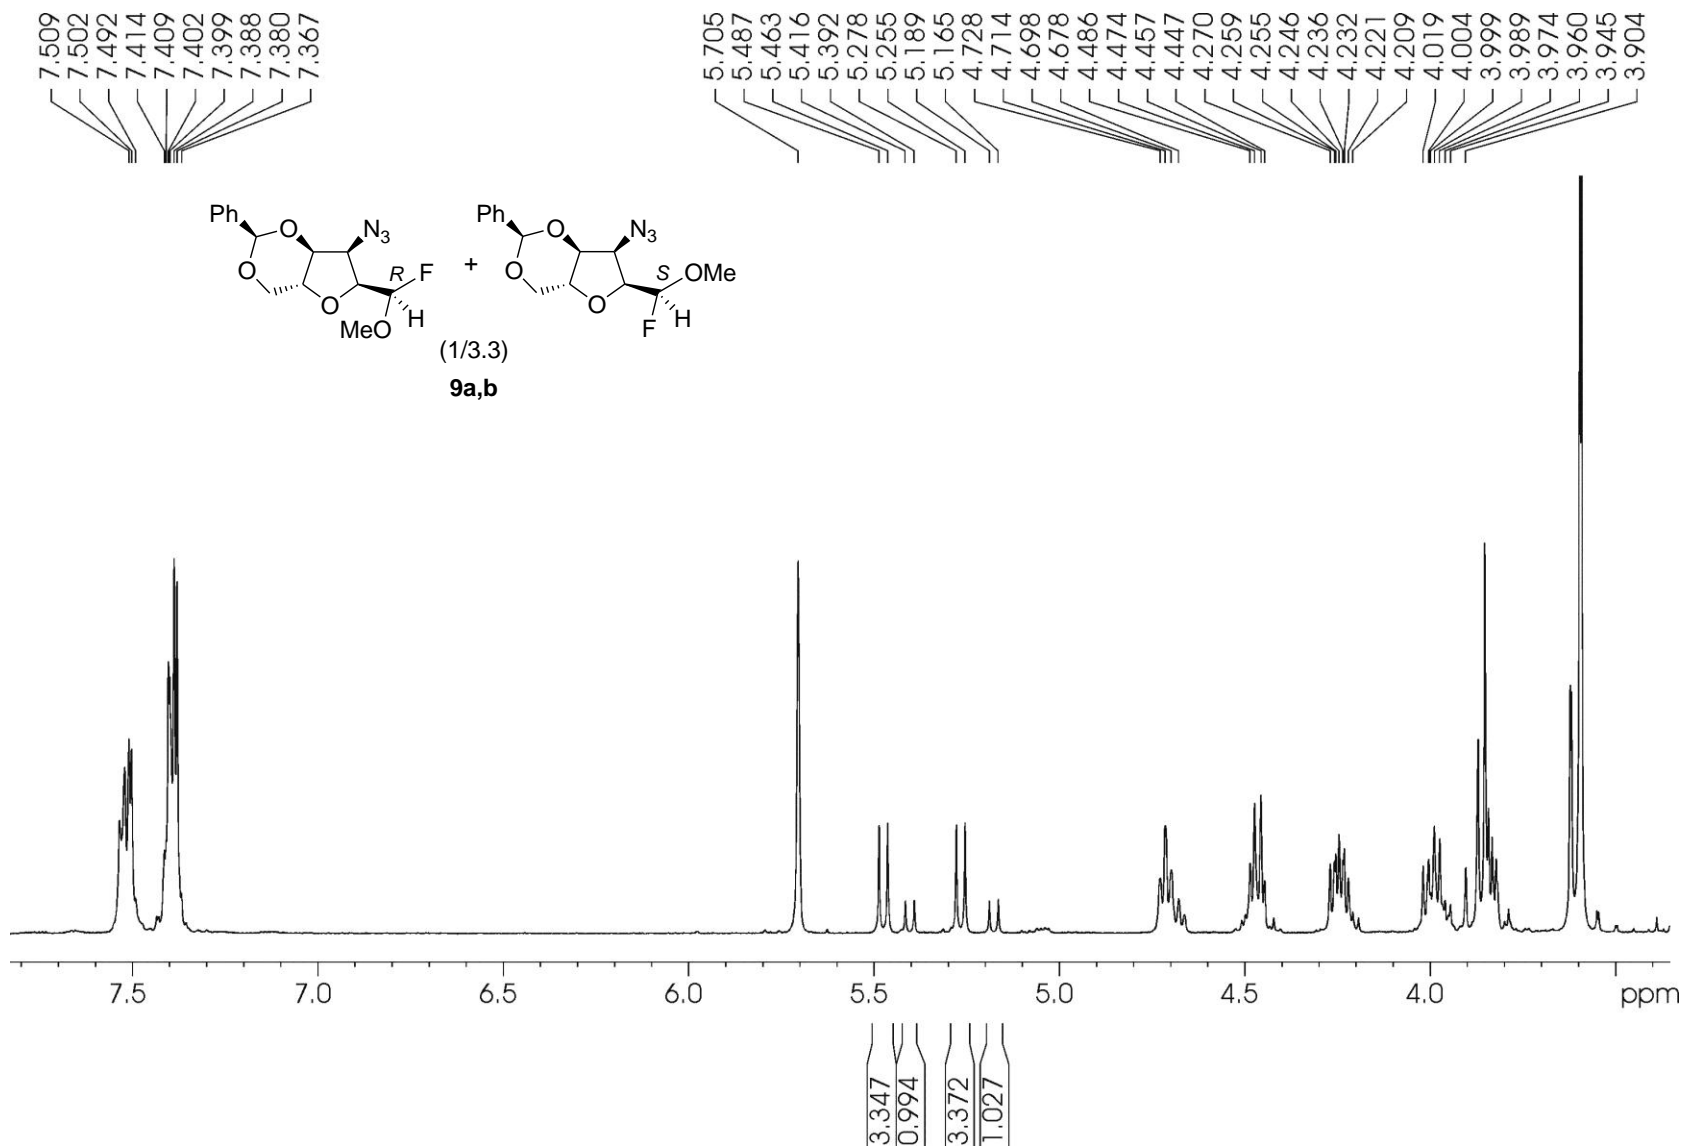

(1R and 1S)-2,5-Anhydro-3-azido-4,6-O-benzylidene-3-deoxy-1-fluoro-1-O-methyl-D-altritol (9a,b)

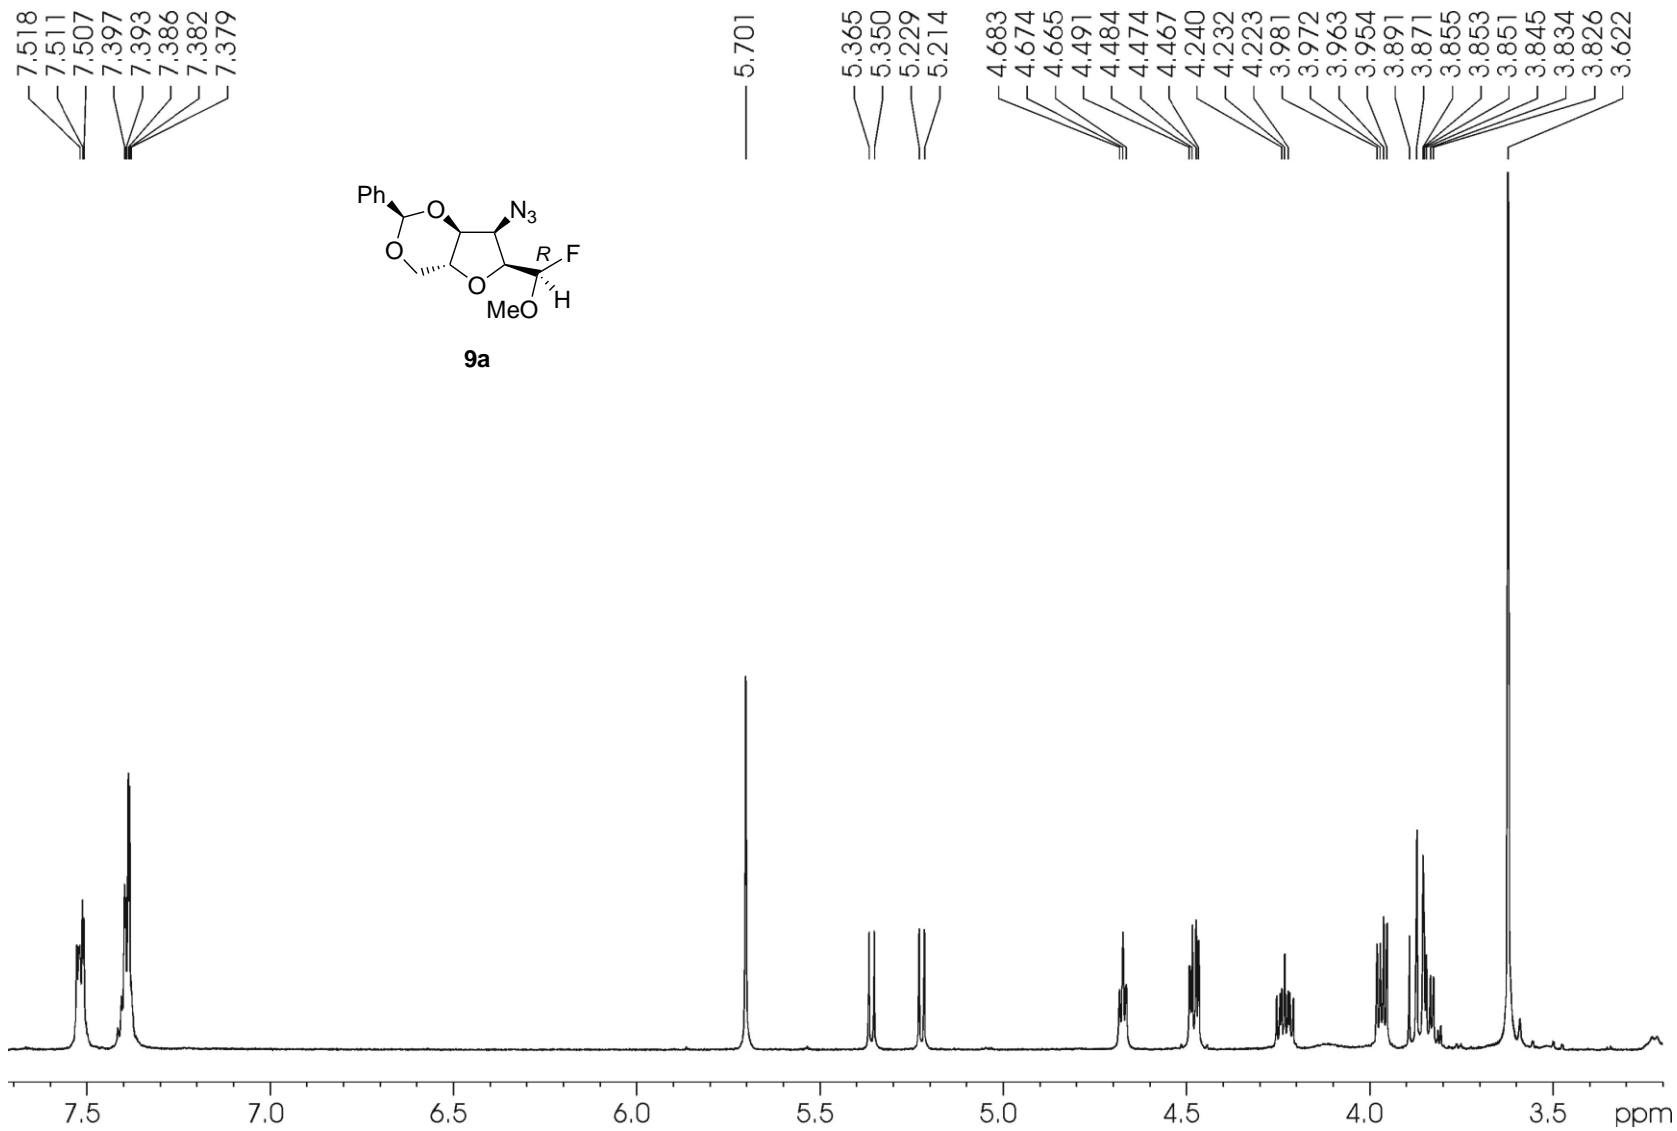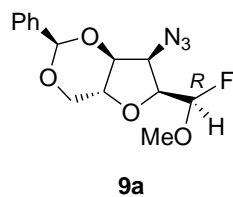

(1R)-2,5-Anhydro-3-azido-4,6-O-benzylidene-3-deoxy-1-fluoro-1-O-methyl-D-altritol (9a)

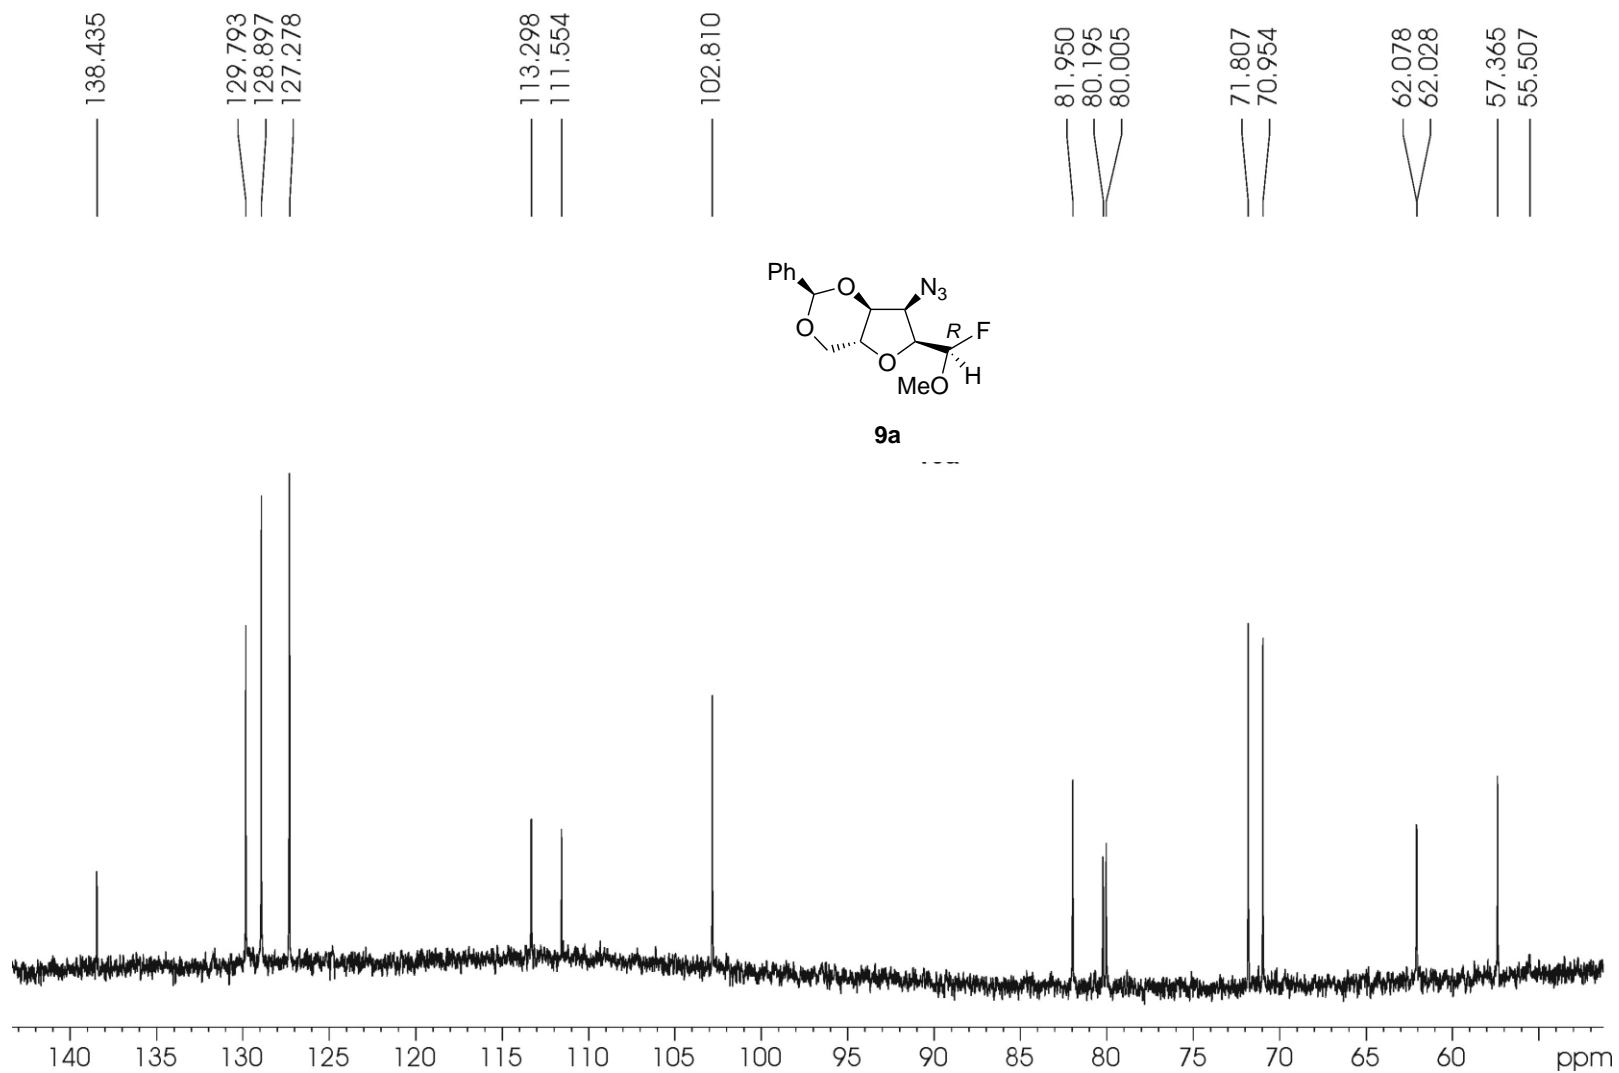

(1*R*)-2,5-Anhydro-3-azido-4,6-*O*-benzylidene-3-deoxy-1-fluoro-1-*O*-methyl-D-altritol (9a)

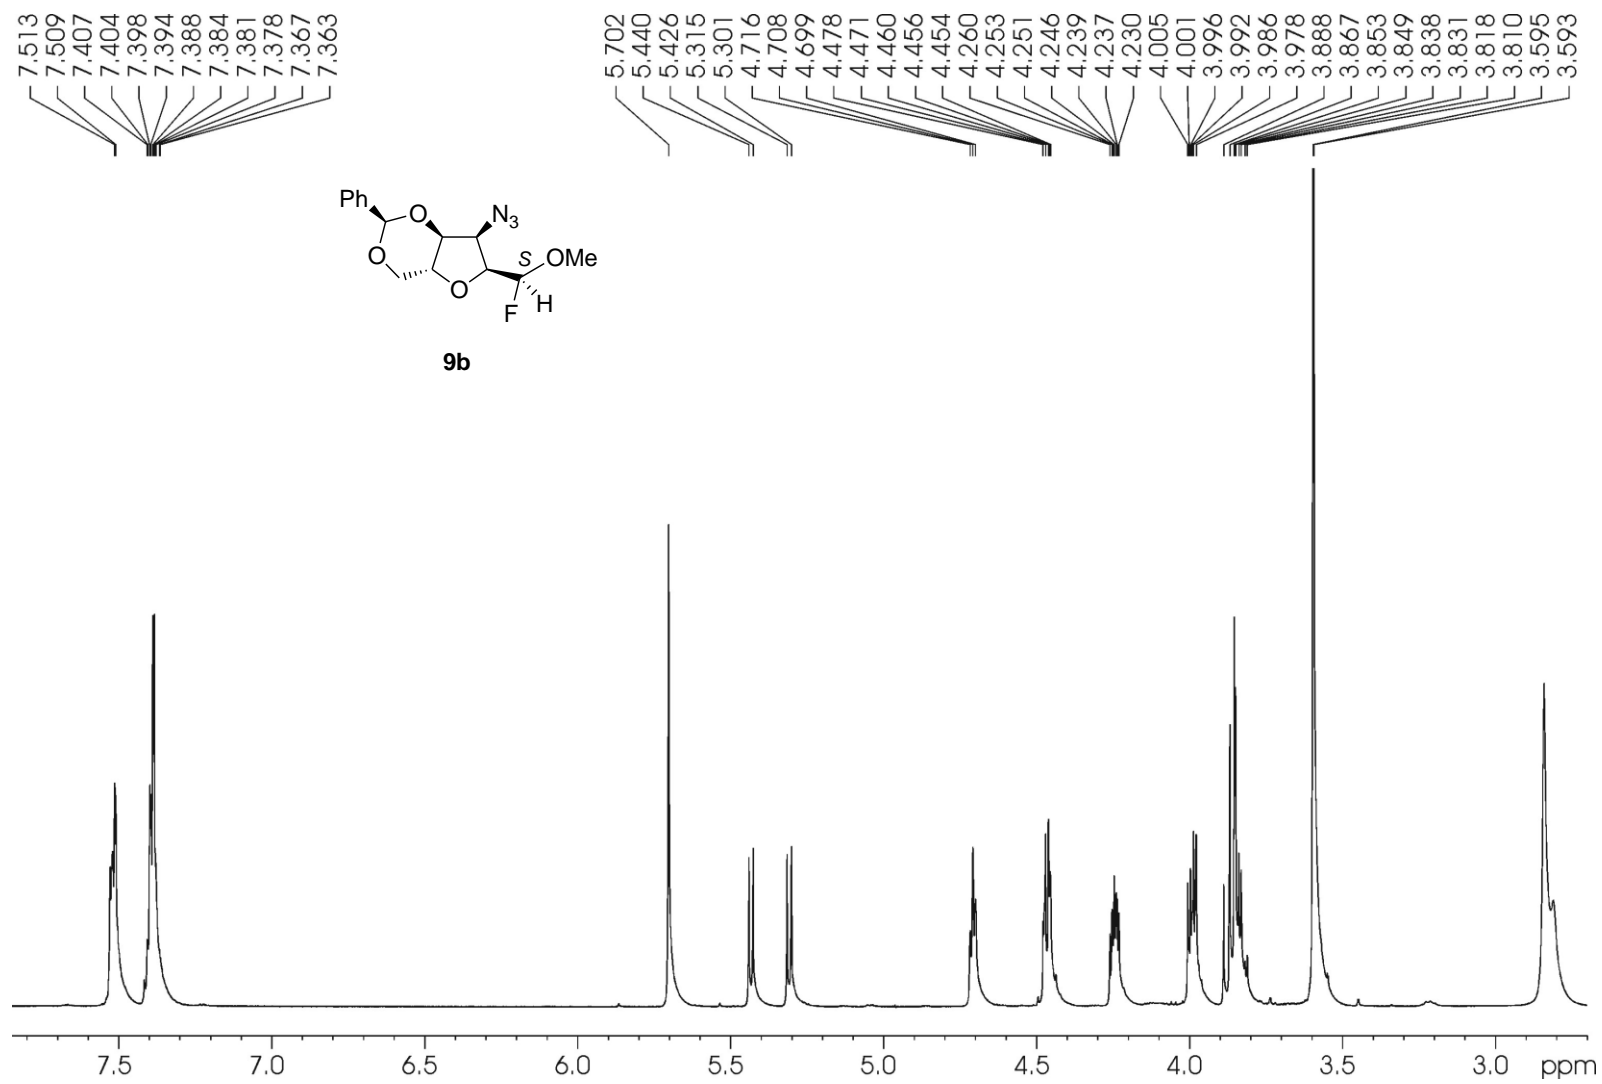

(1S)-2,5-Anhydro-3-azido-4,6-O-benzylidene-3-deoxy-1-fluoro-1-O-methyl-D-altritol (**9b**)

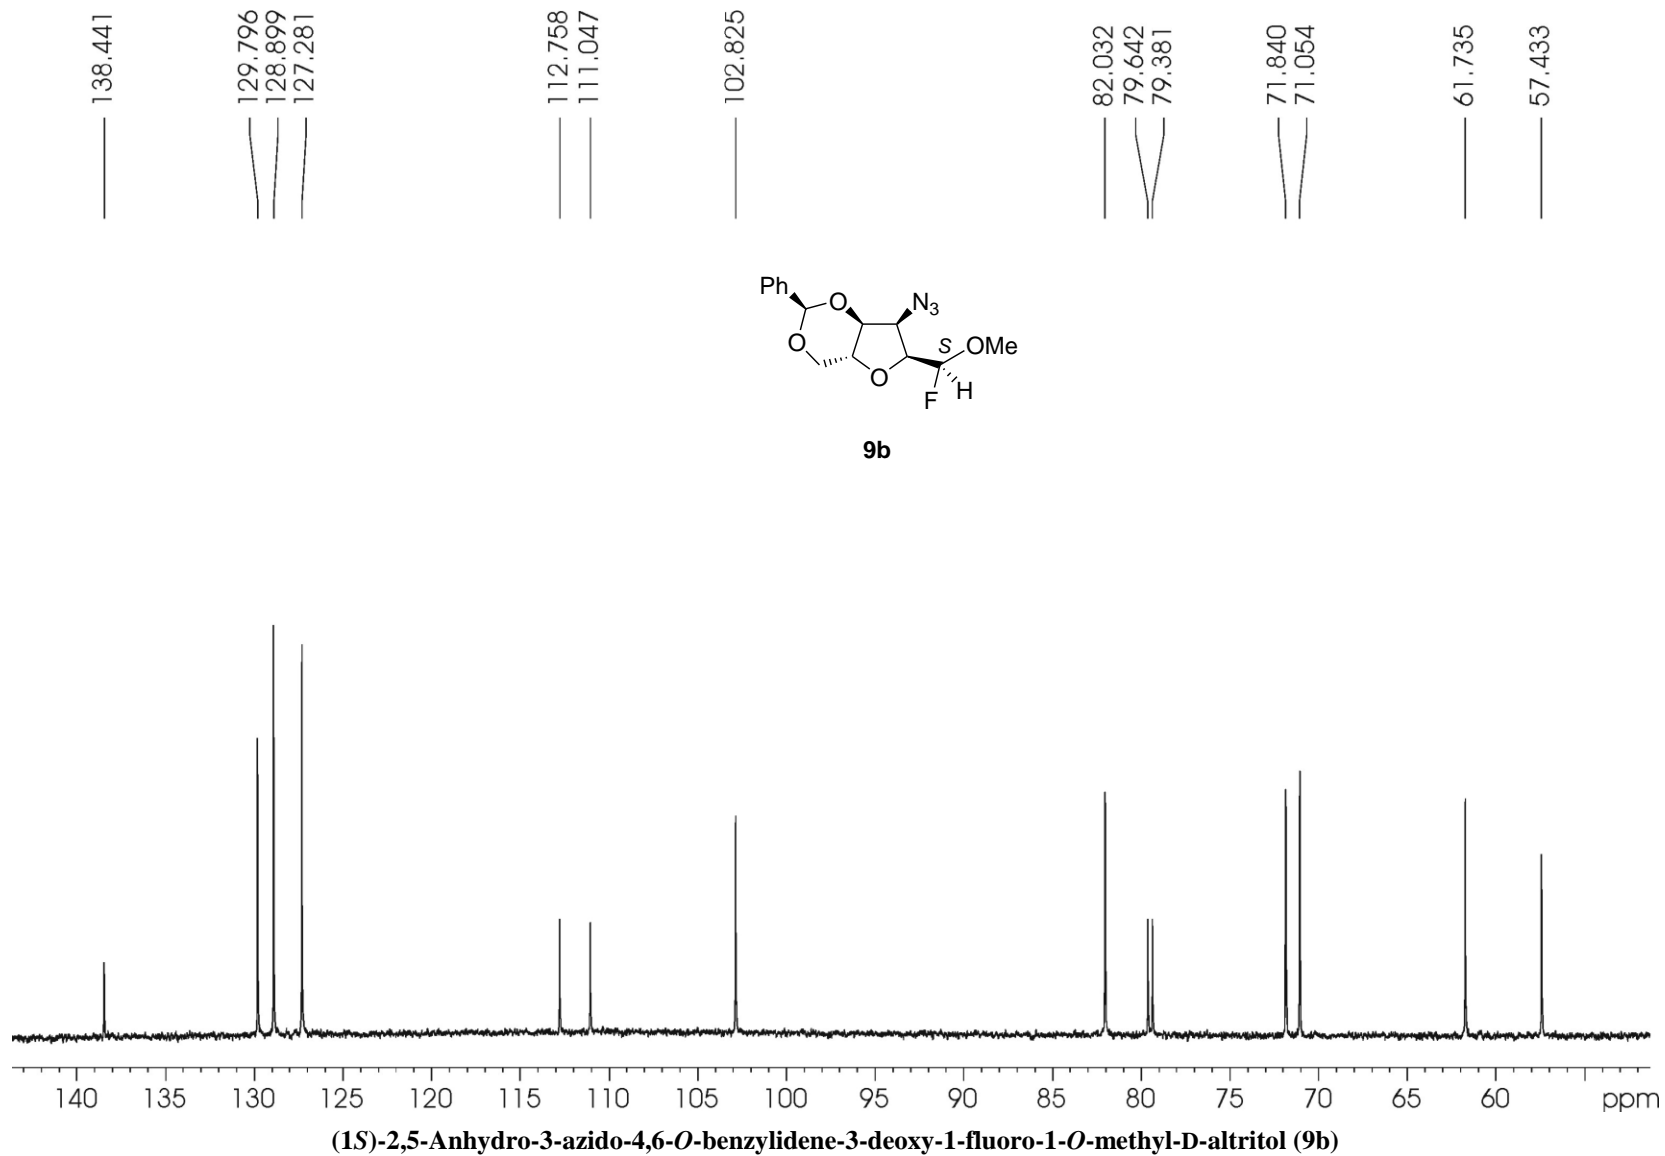

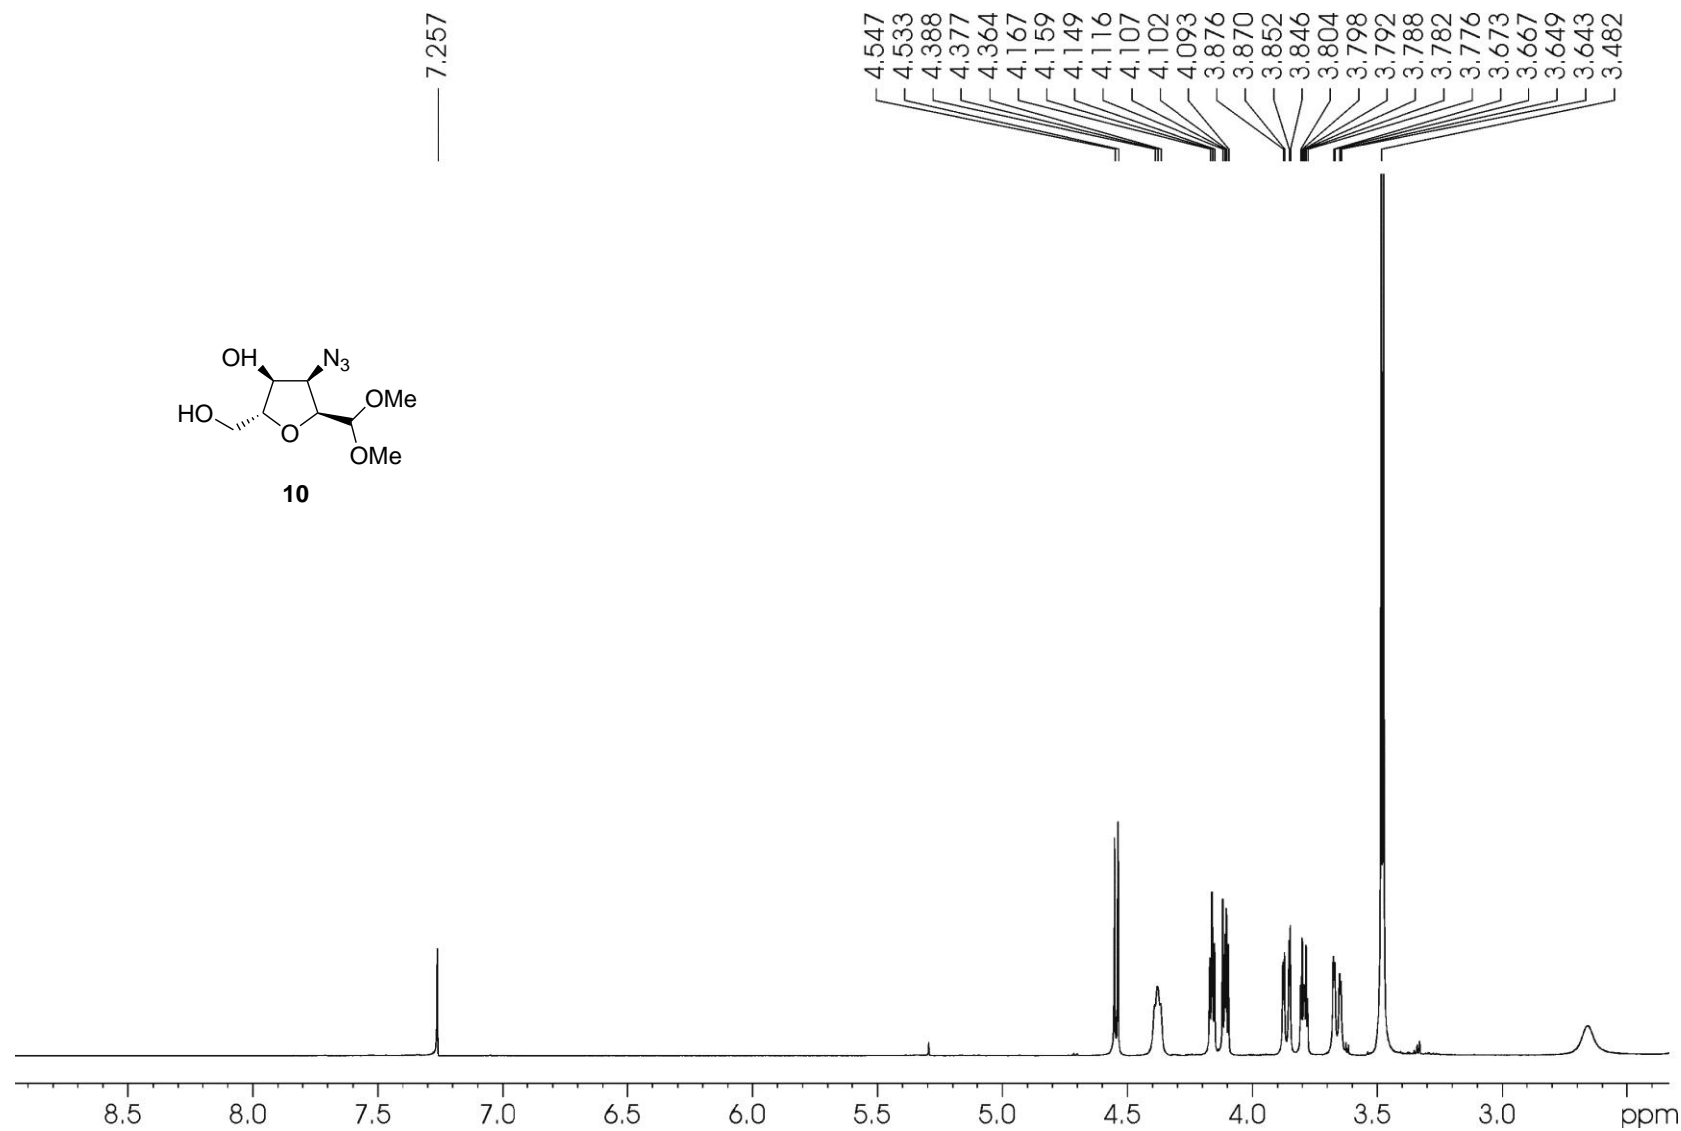

**2,5-Anhydro-3-azido-3-deoxy-*D*-altrose dimethylacetal (10)**

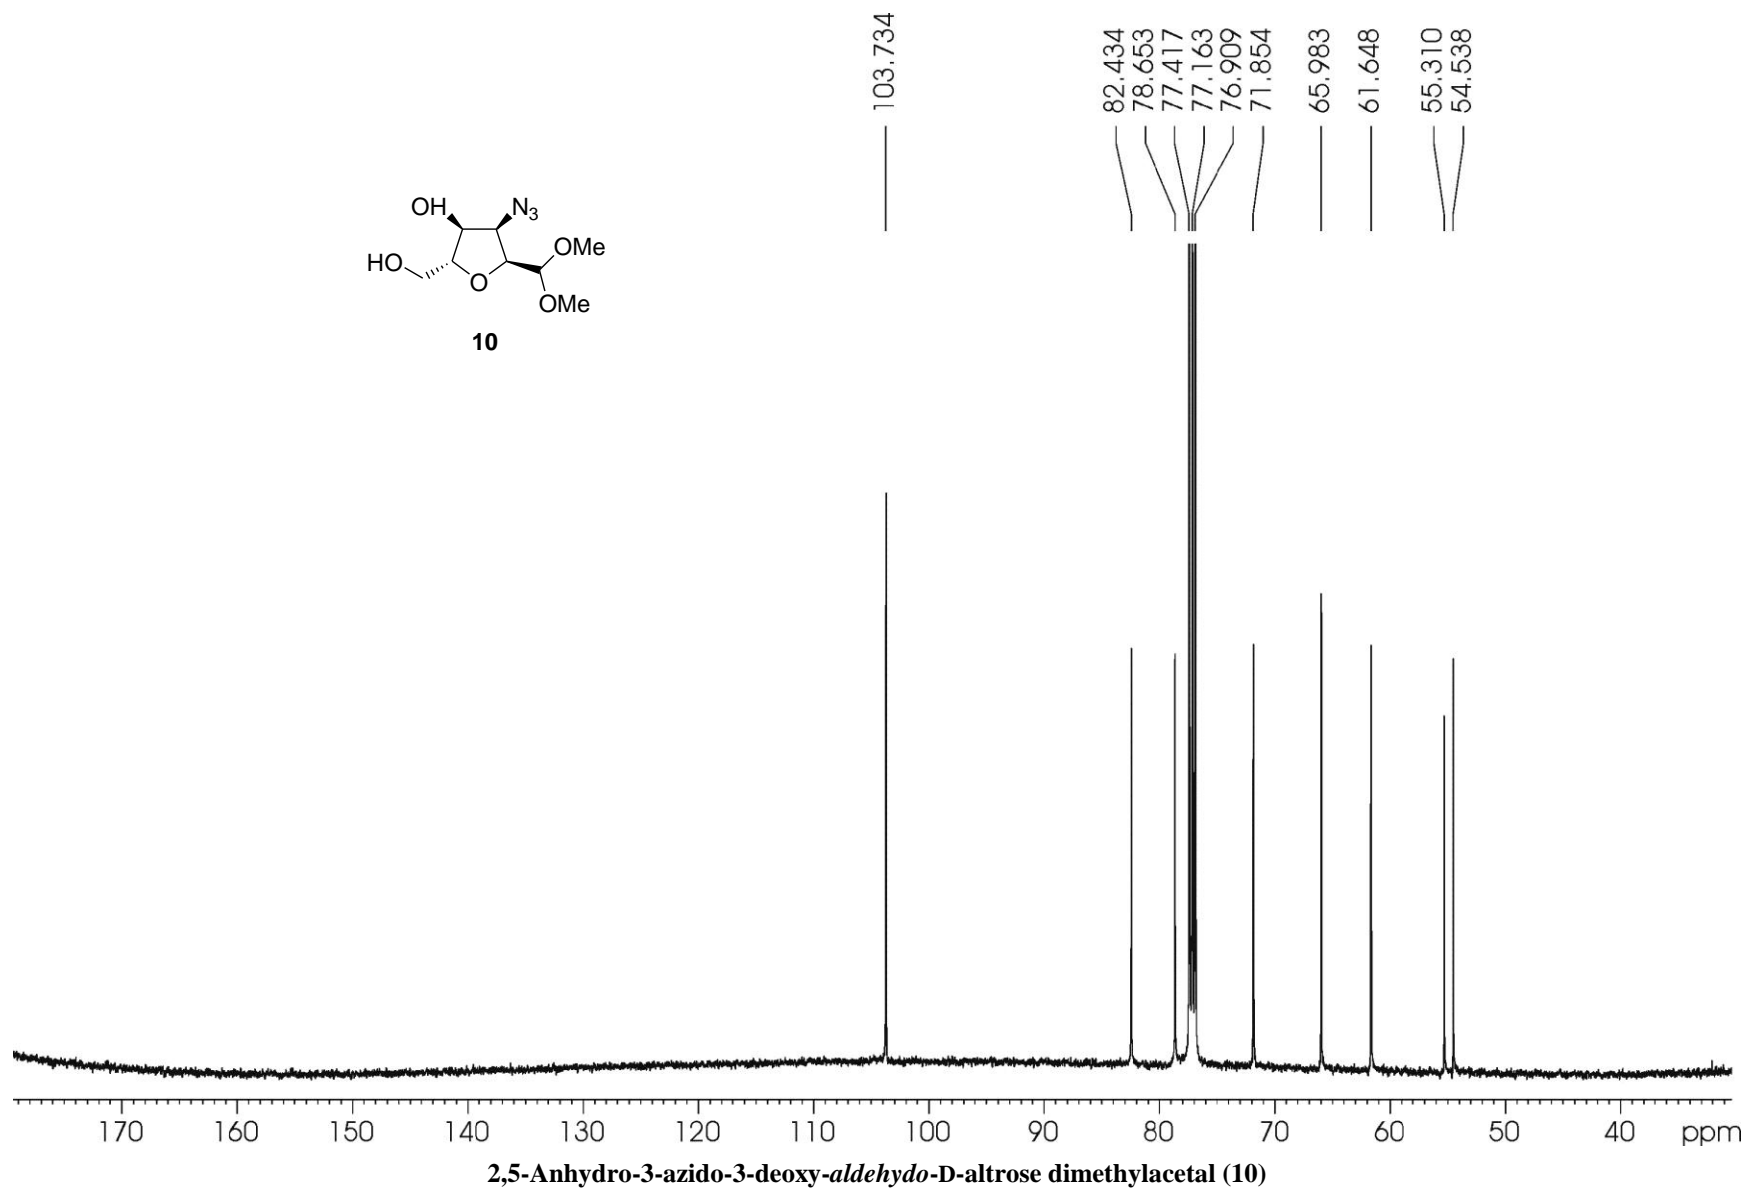



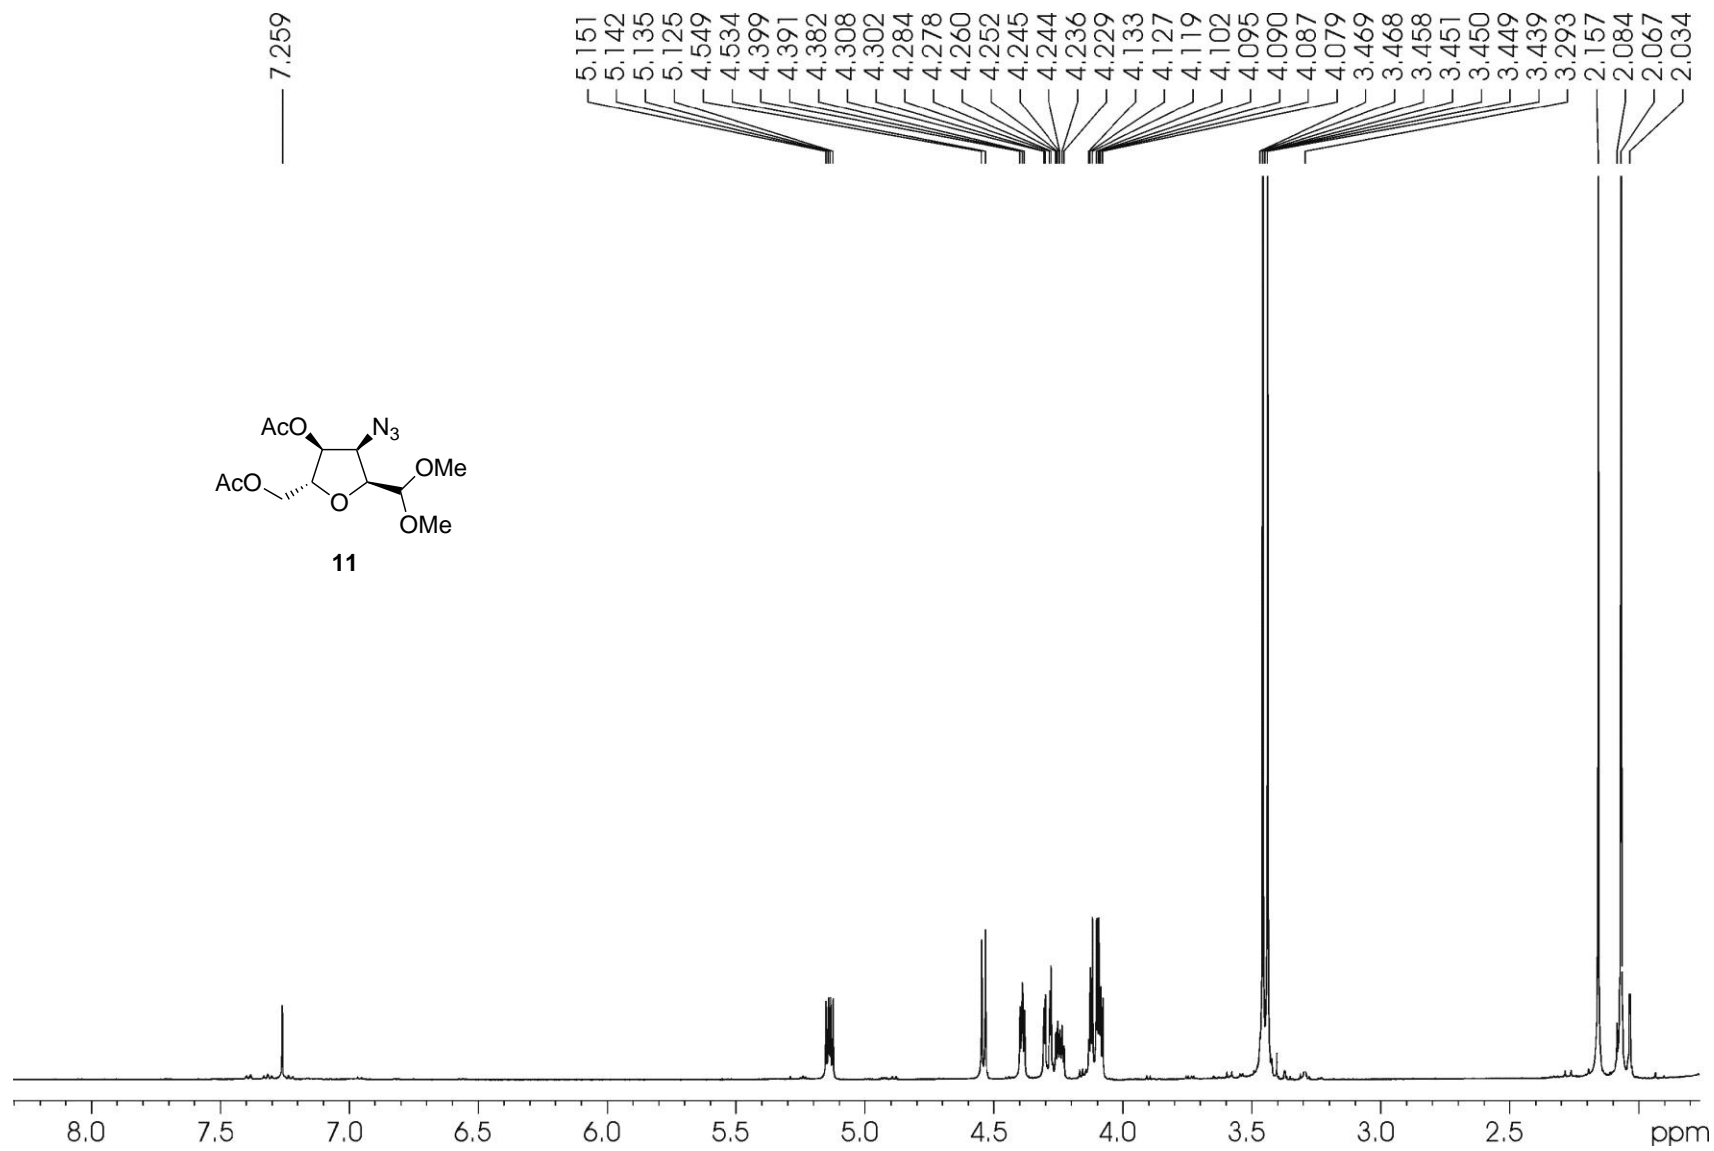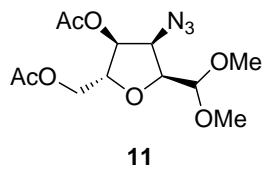

**4,6-Di-O-acetyl-2,5-anhydro-3-azido-3-deoxy-aldehydro-D-altrose dimethylacetal (11)**

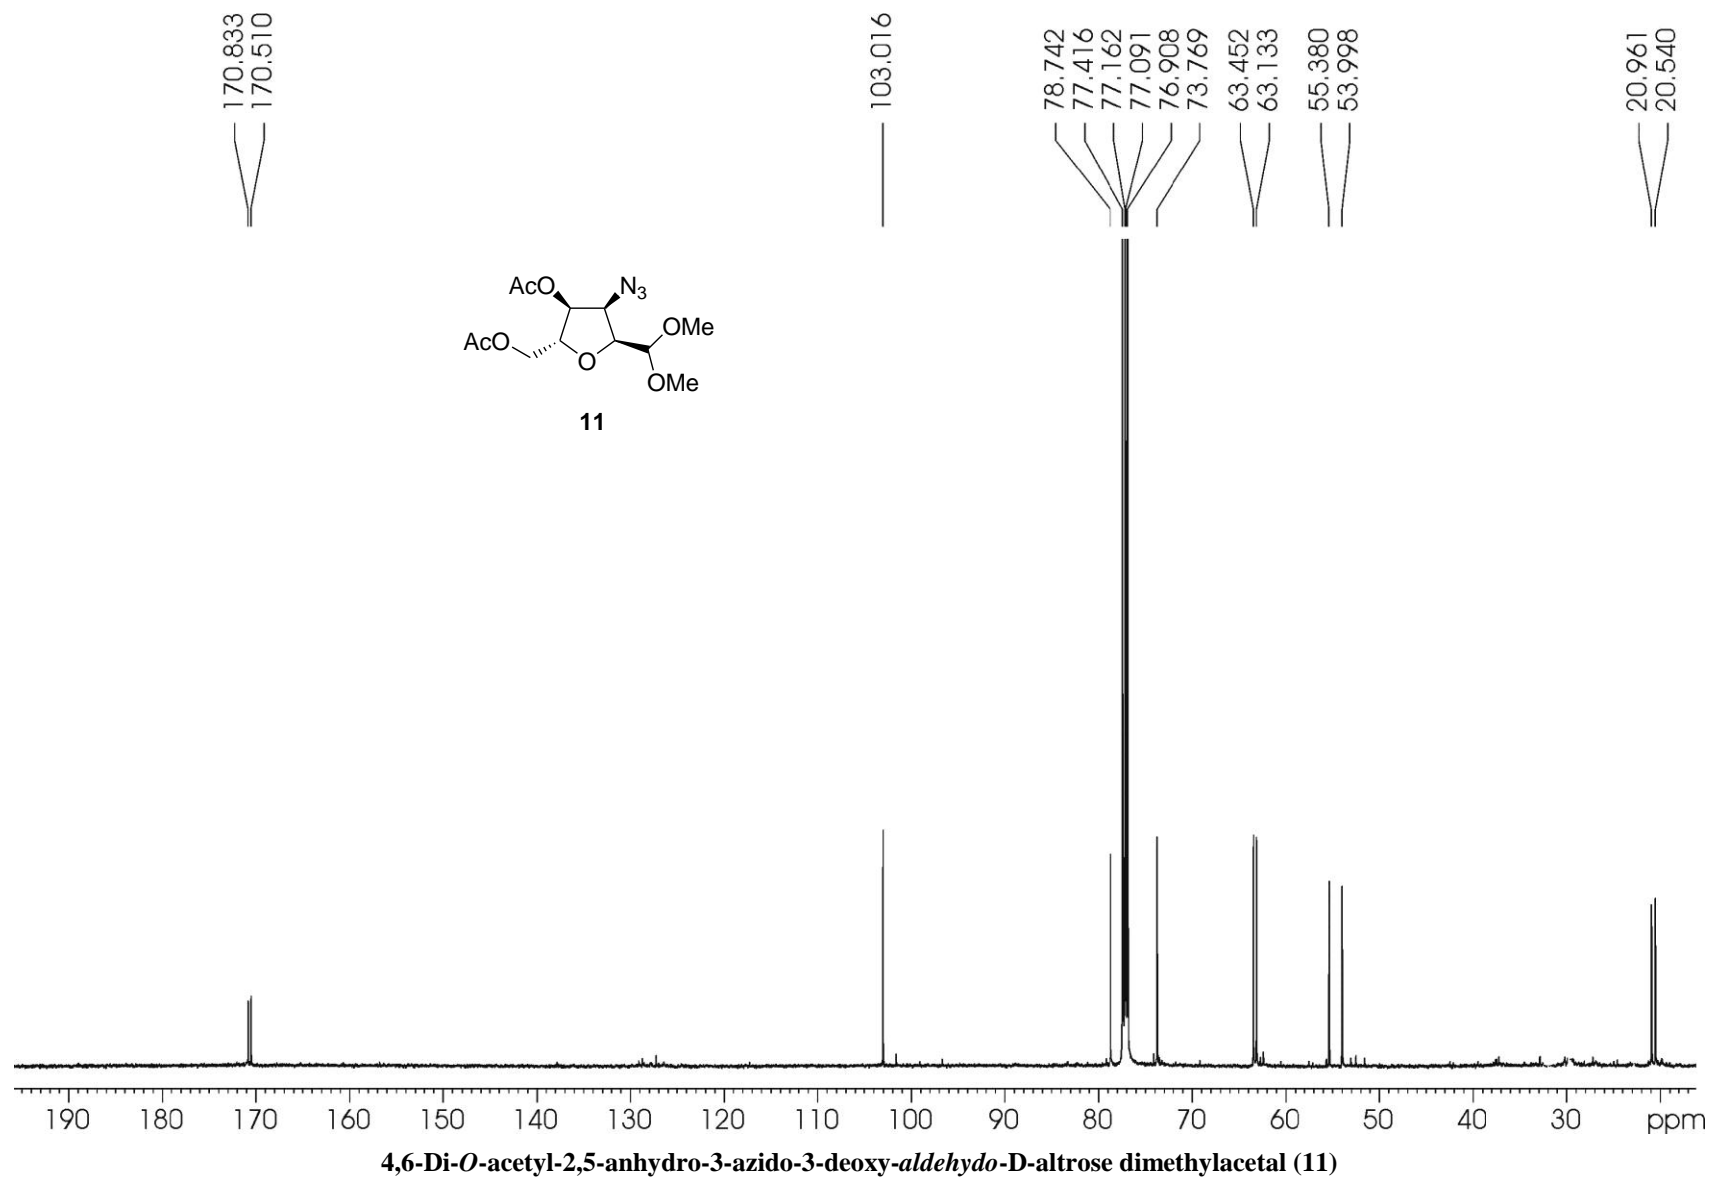

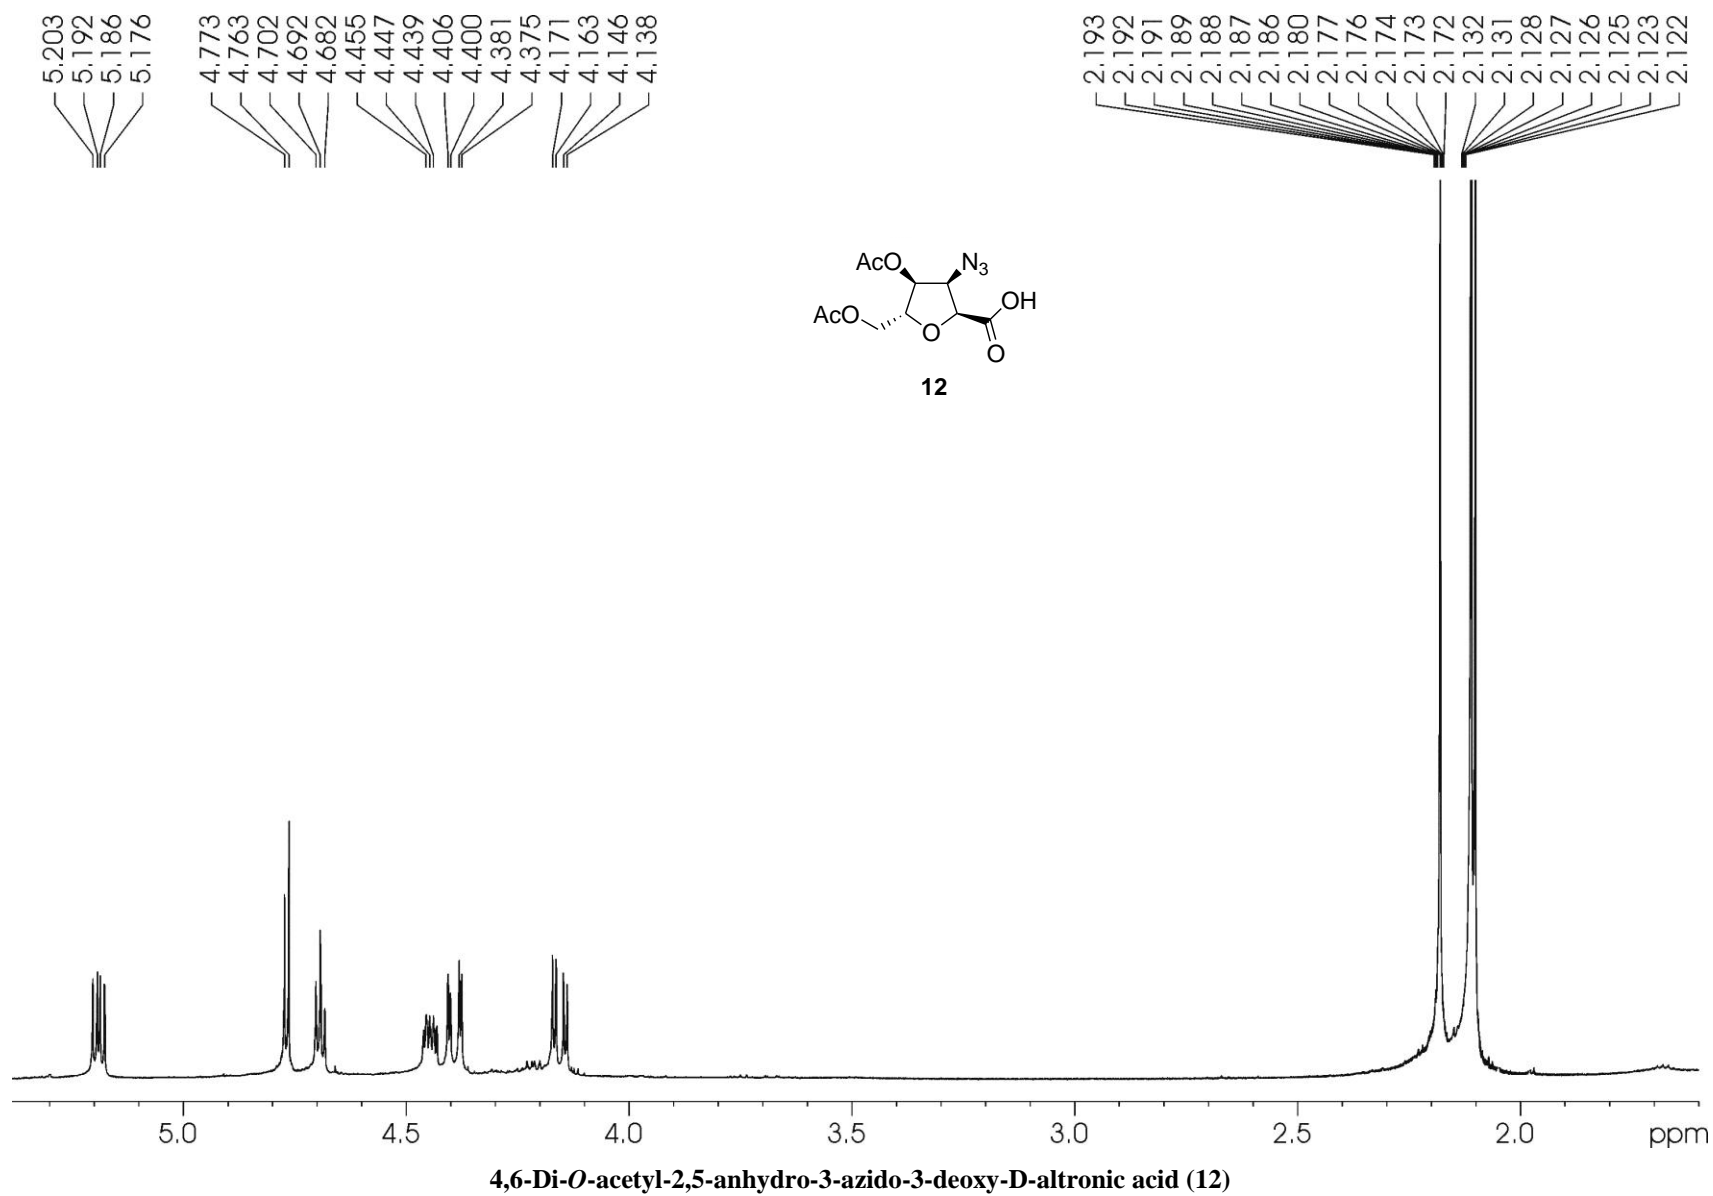

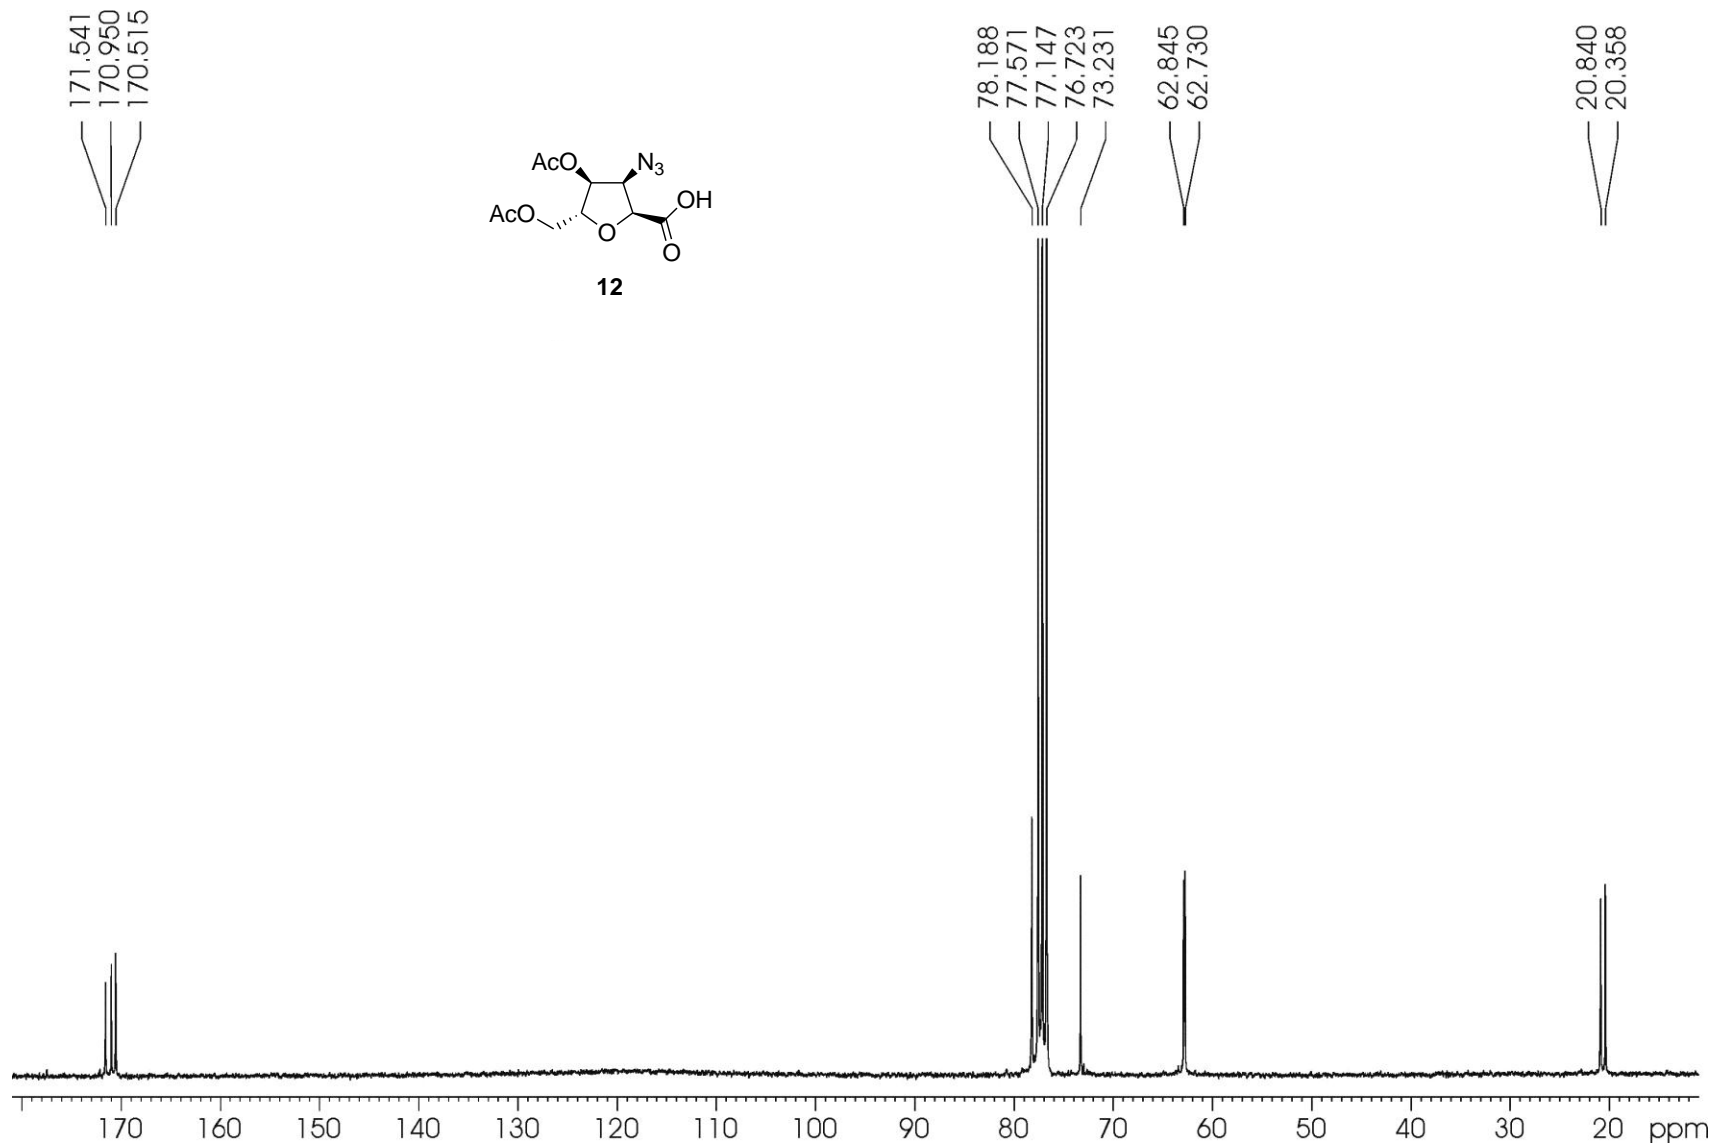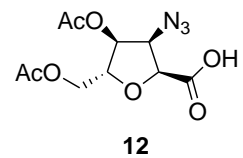

**4,6-Di-O-acetyl-2,5-anhydro-3-azido-3-deoxy-D-altronic acid (12)**

S12

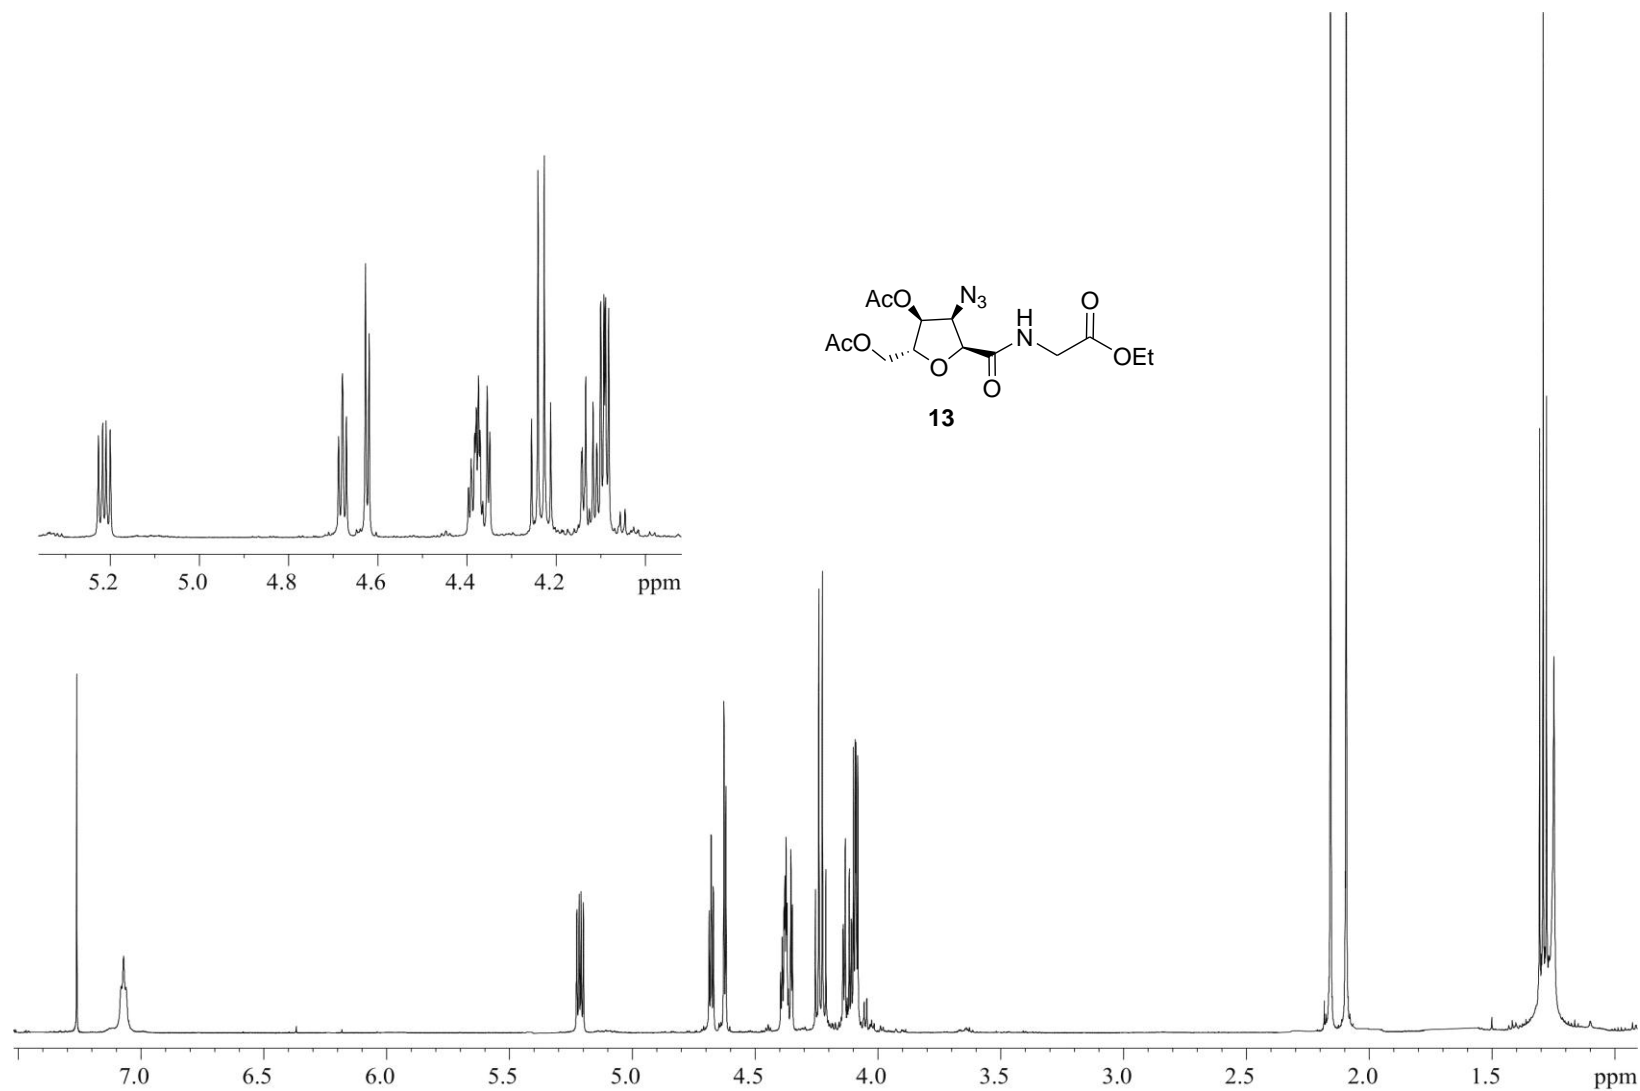

**4,6-Di-O-acetyl-2,5-anhydro-3-azido-3-deoxy-N-(ethoxycarbonylmethyl)- $\alpha$ -D-altruronamide (13)**

S13

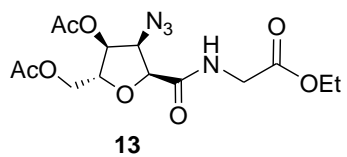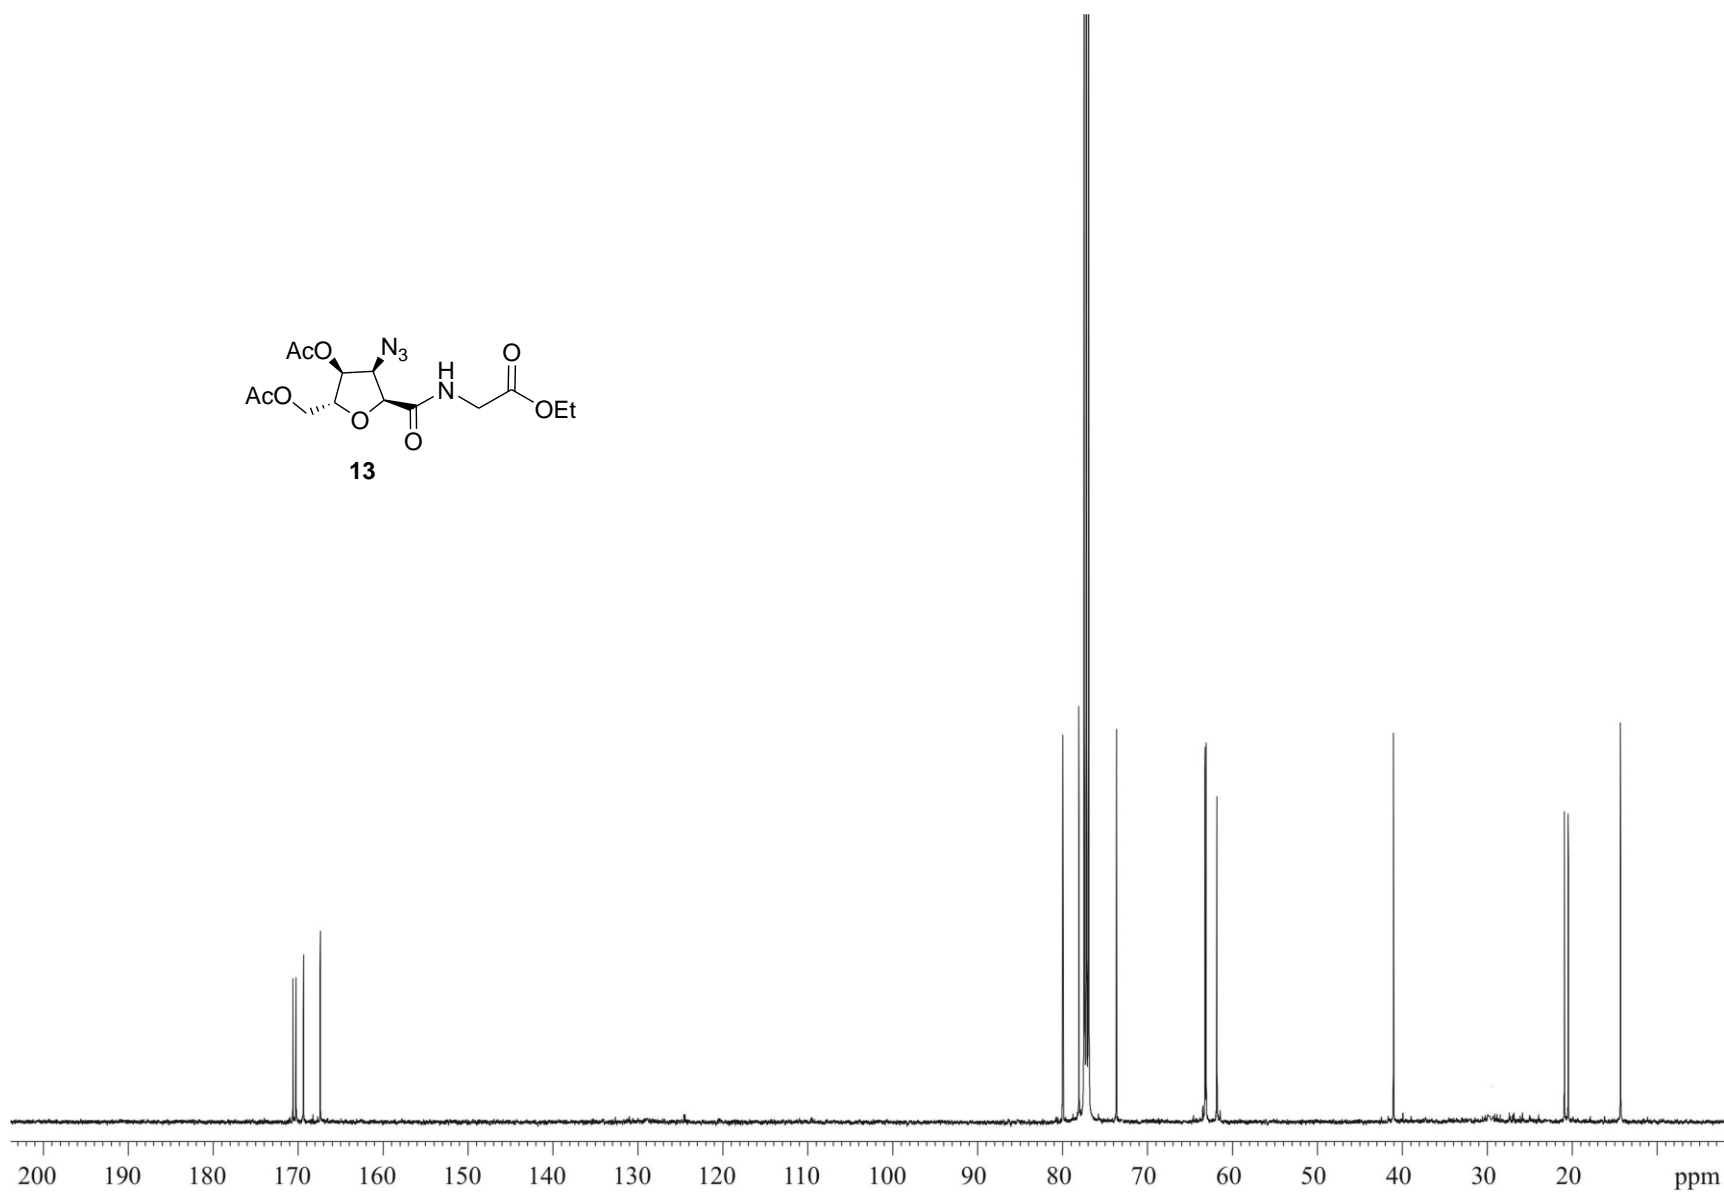

**4,6-Di-O-acetyl-2,5-anhydro-3-azido-3-deoxy-N-(ethoxycarbonylmethyl)- $\alpha$ -D-altruronamide (13)**

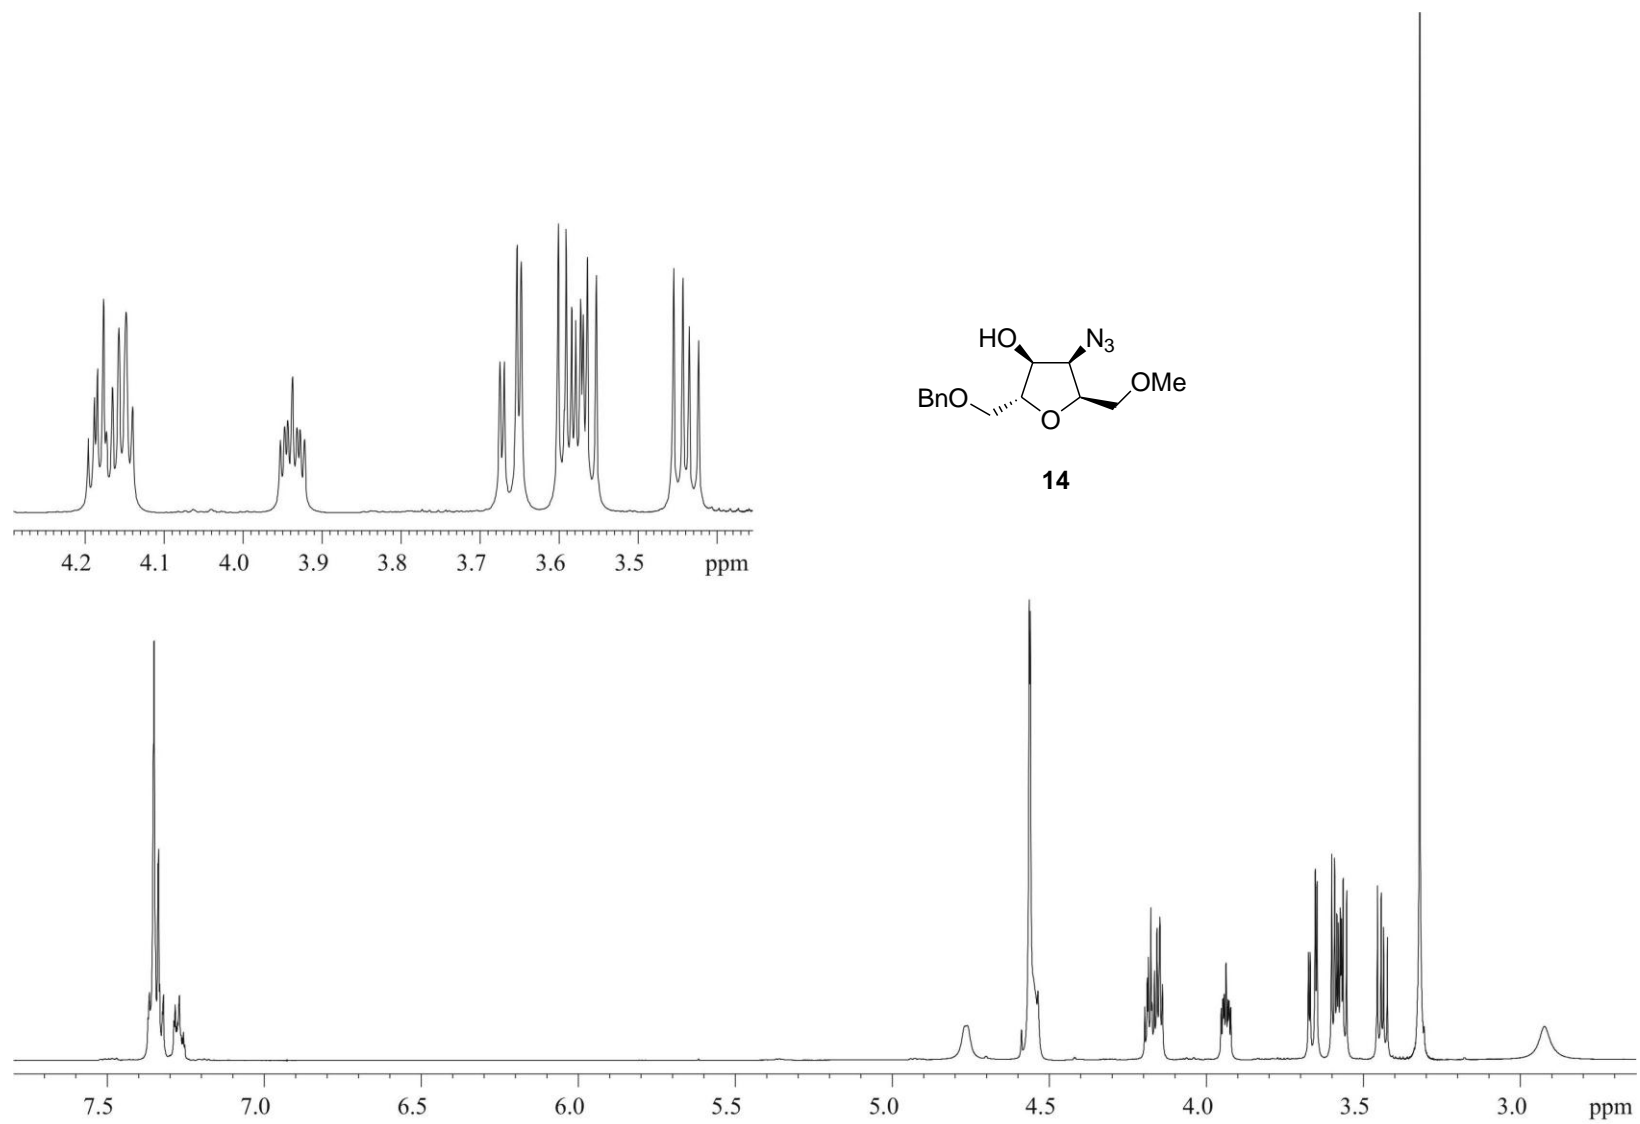

**2,5-Anhydro-3-azido-6-*O*-benzyl-3-deoxy-1-*O*-methyl-D-altritol (14)**

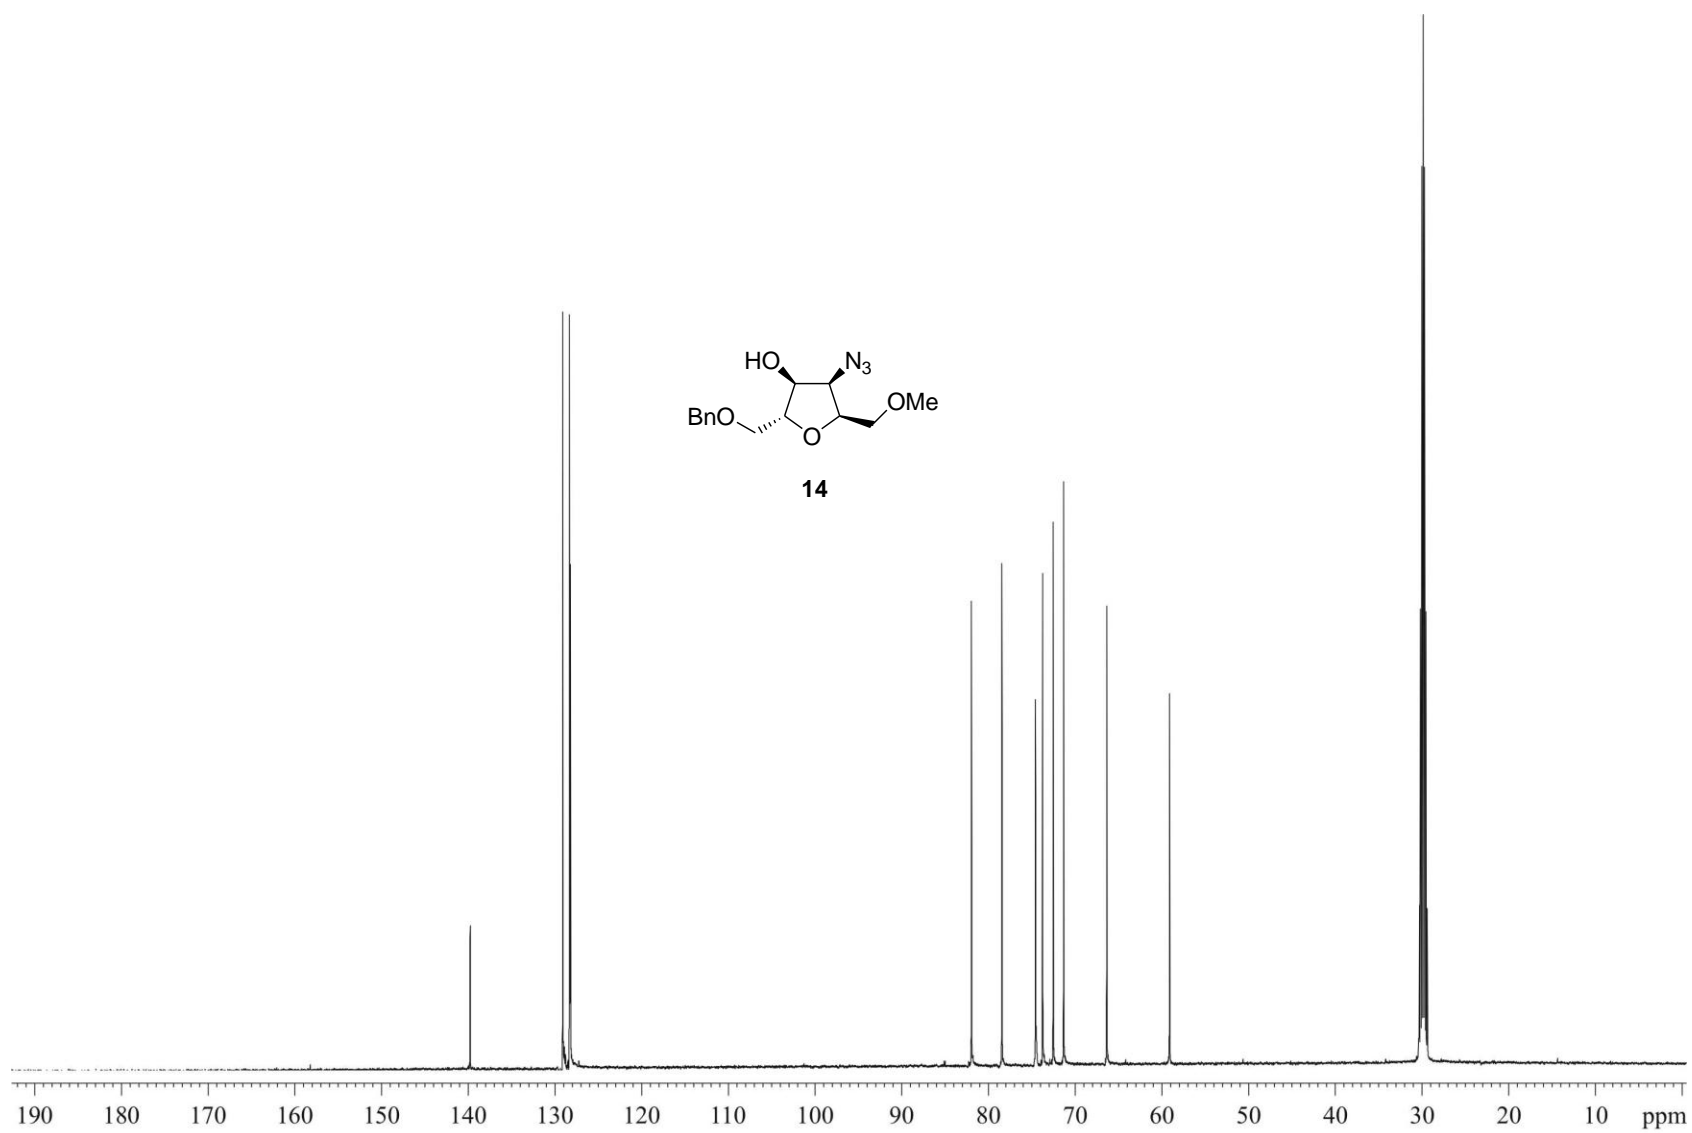

**2,5-Anhydro-3-azido-6-O-benzyl-3-deoxy-1-O-methyl-D-altritol (14)**

S16



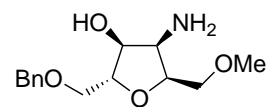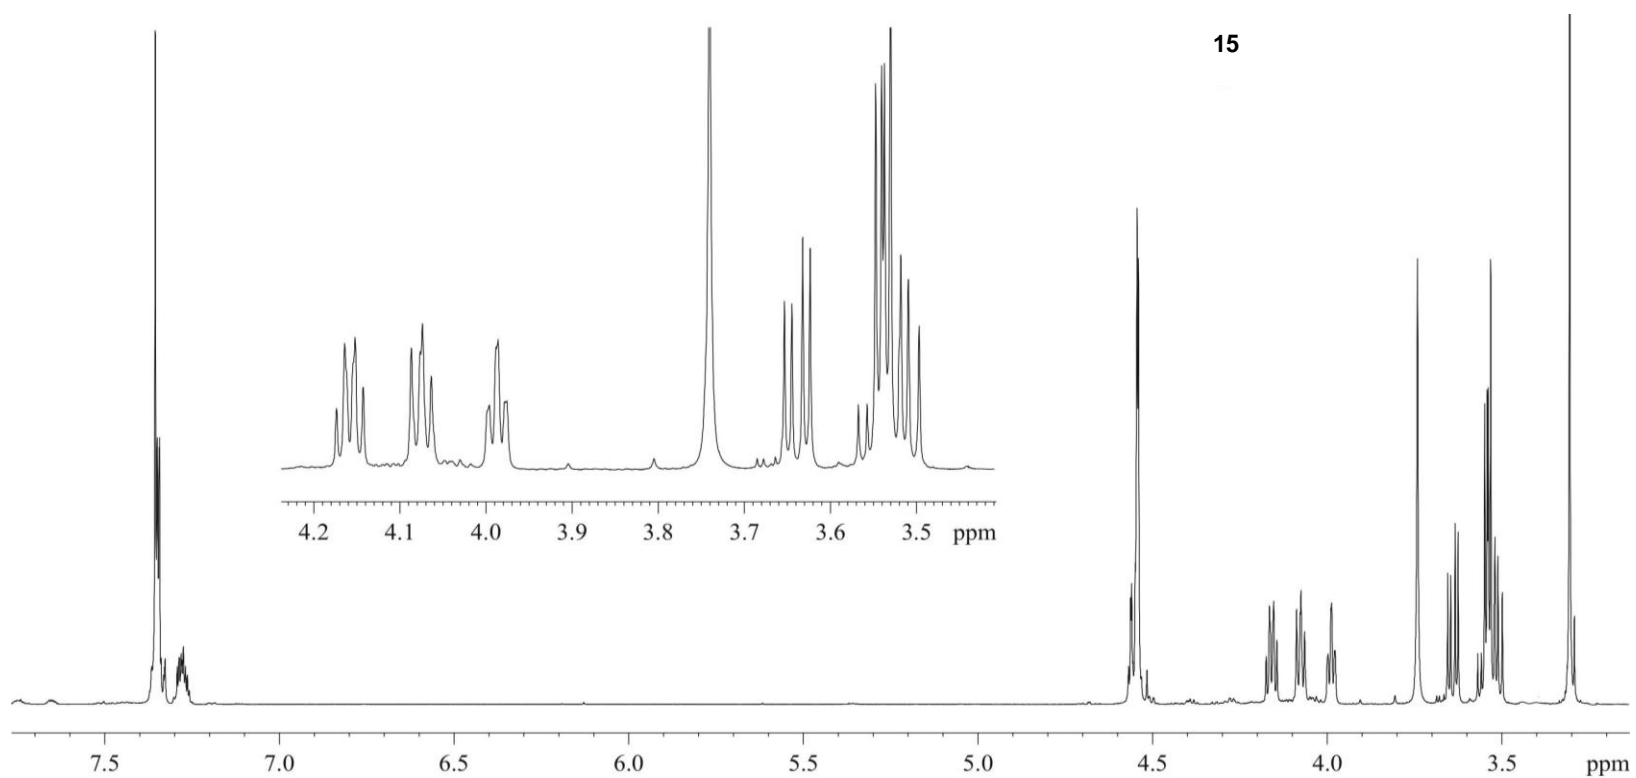

**2,5-Anhydro-3-amino-6-O-benzyl-3-deoxy-1-O-methyl-D-altritol (15)**

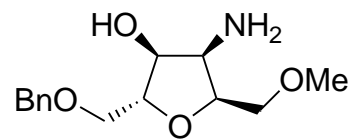

**15**

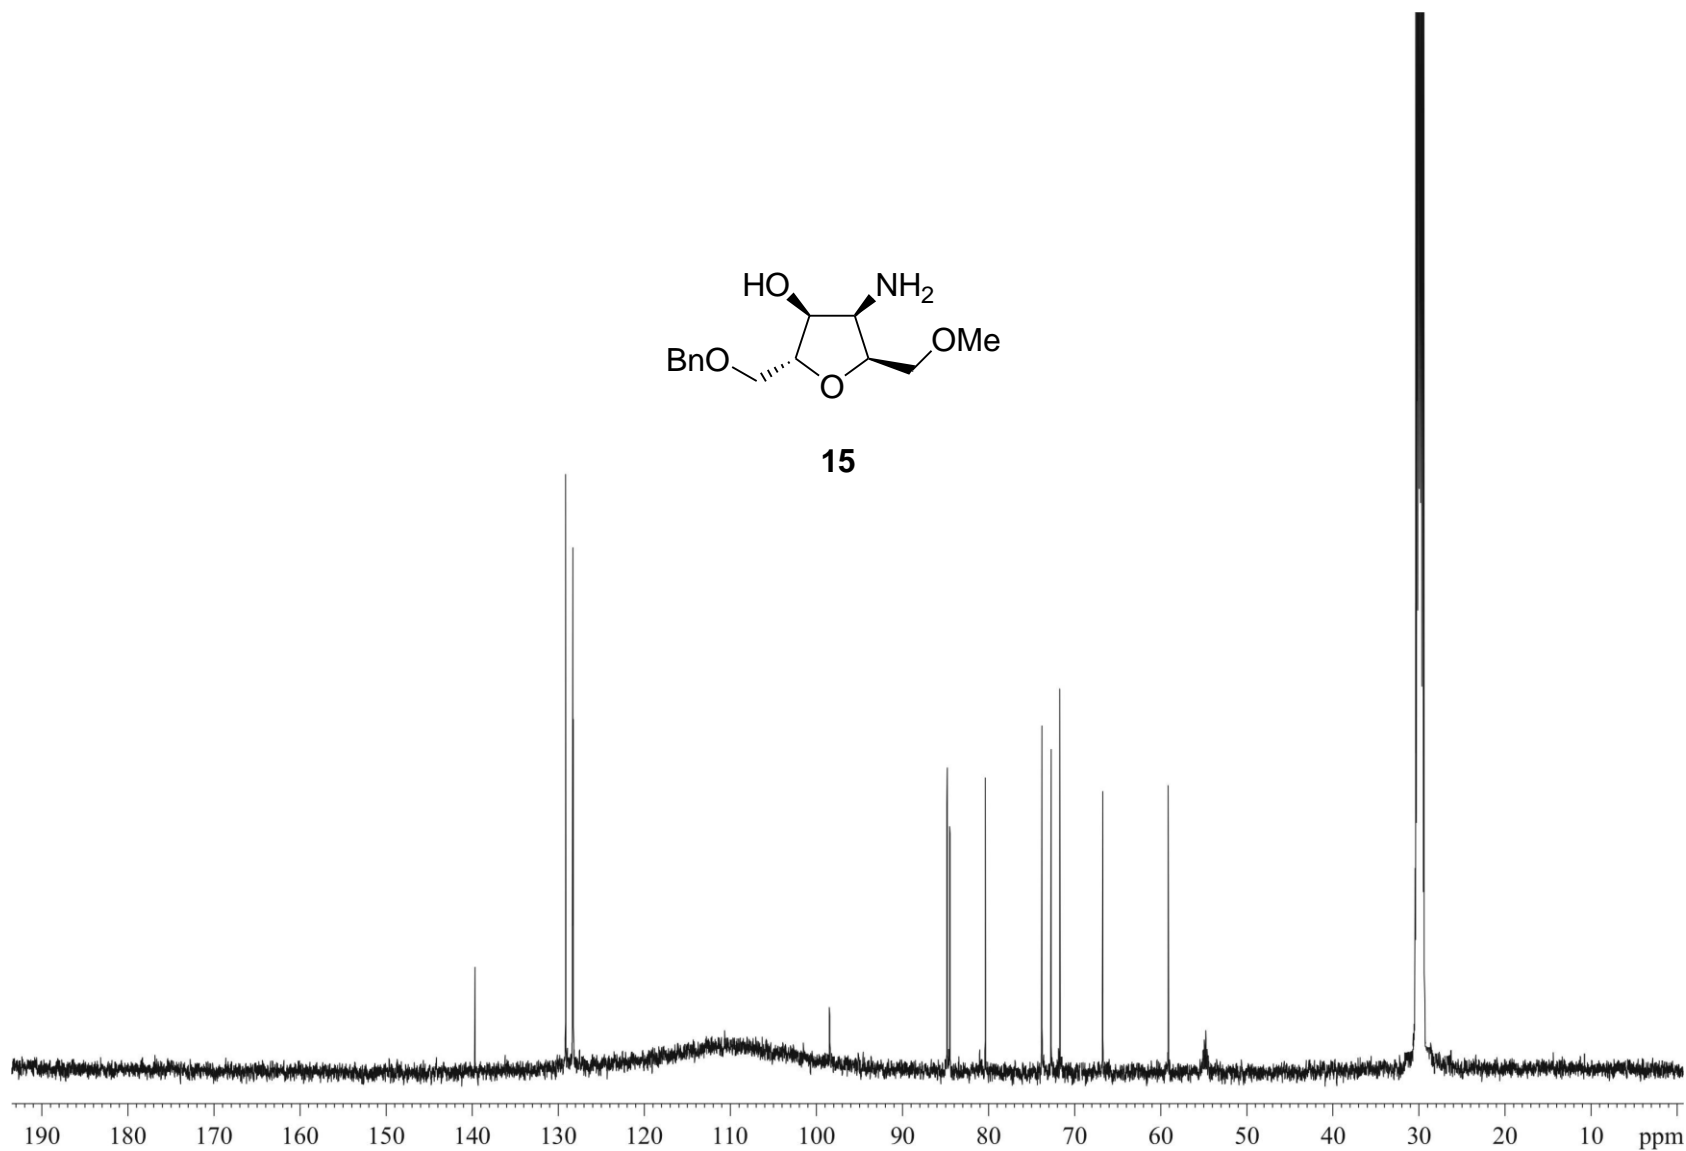

**2,5-Anhydro-3-amino-6-O-benzyl-3-deoxy-1-O-methyl-D-altritol (15)**

S18

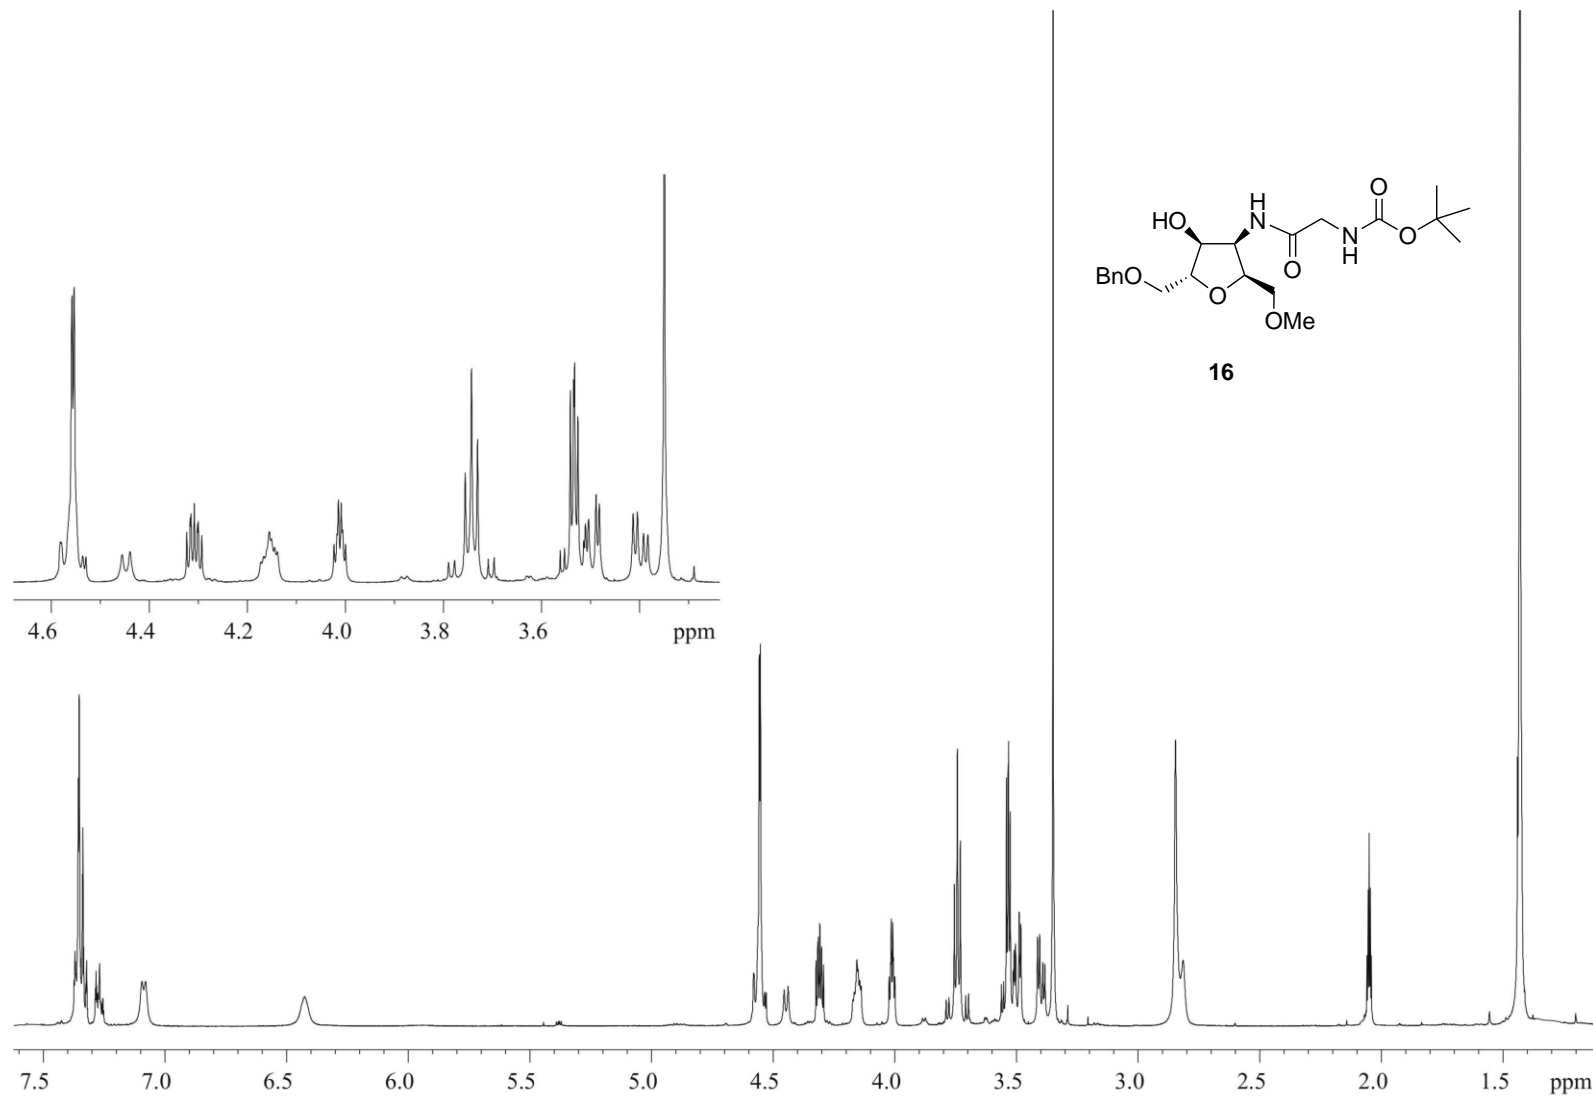

**2,5-Anhydro-3--(*N*-*tert*-butoxycarbonyl-glycylamido)-6-*O*-benzyl-3-deoxy-1-*O*-methyl-D-altritol (16)**

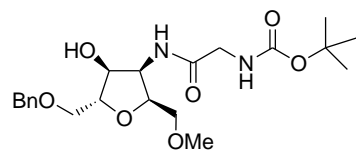

16

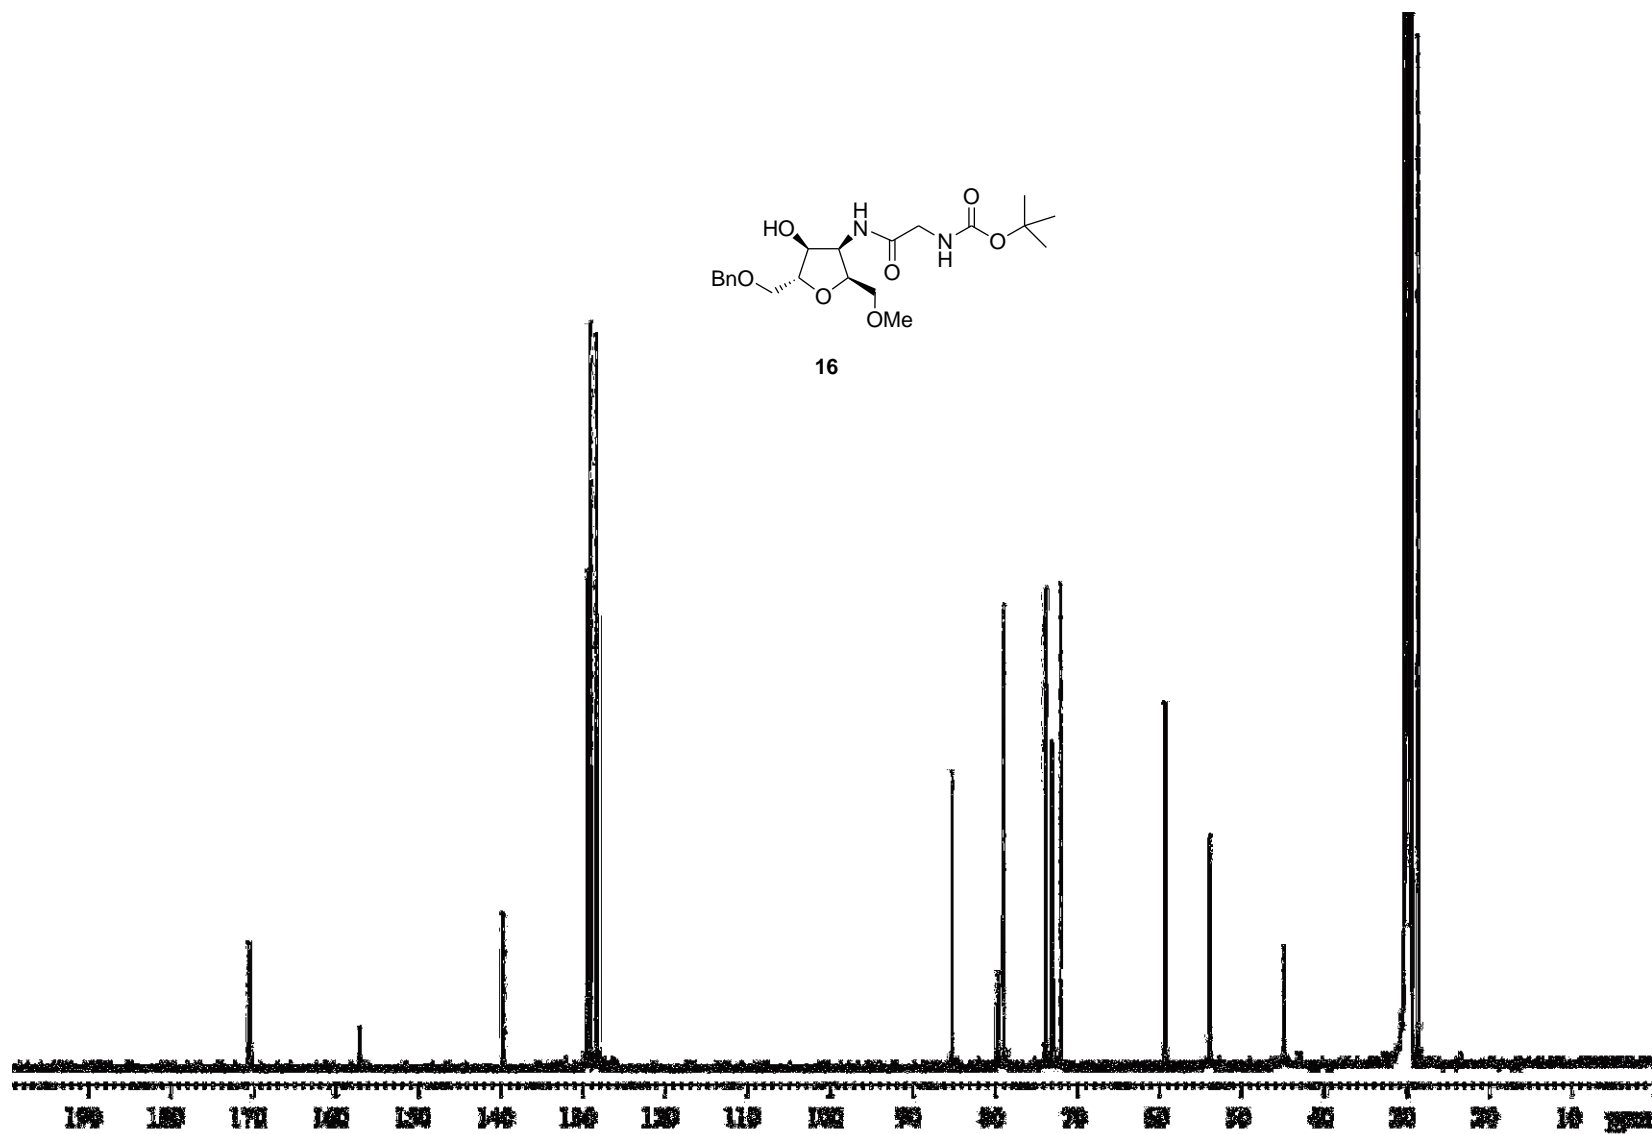

2,5-Anhydro-3-(*N*-*tert*-butoxycarbonyl-glycylamido)-6-*O*-benzyl-3-deoxy-1-*O*-methyl-D-altritol (16)

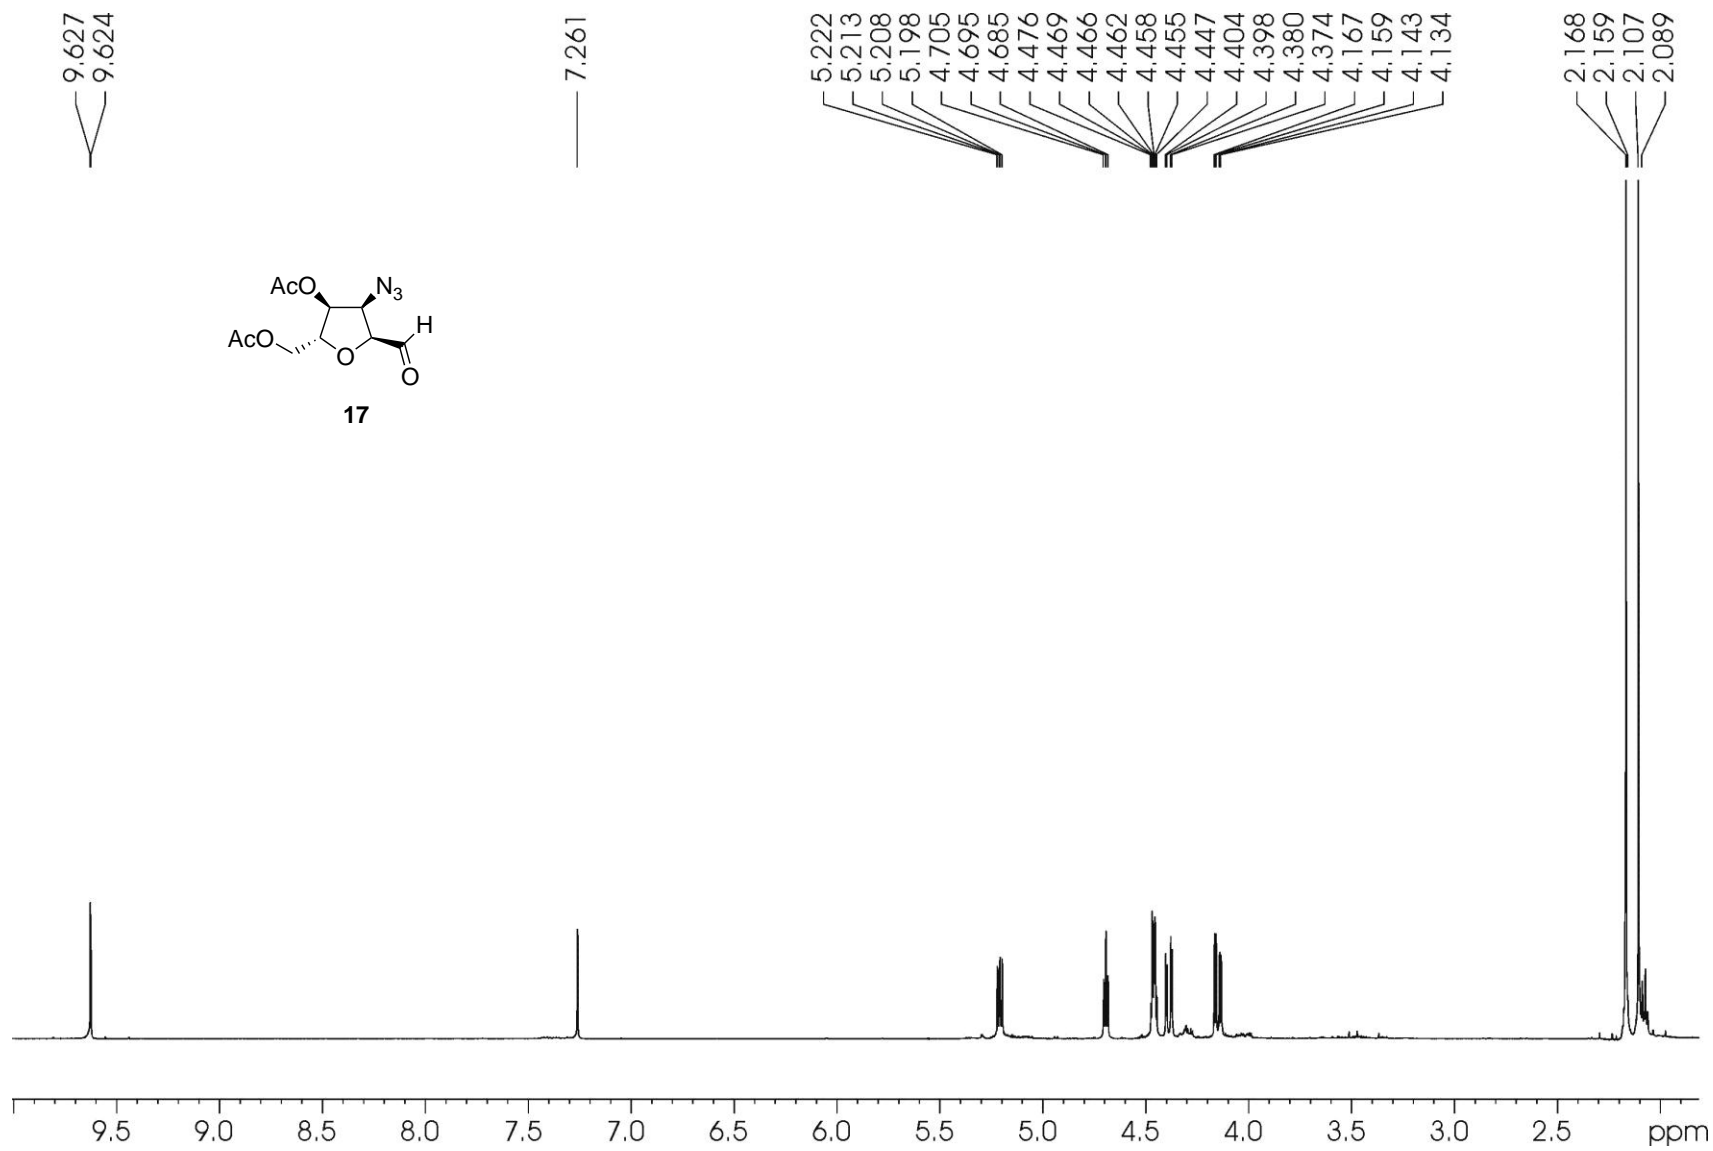

**4,6-Di-O-acetyl-2,5-anhydro-3-azido-3-deoxy-D-altrose (17)**

S21

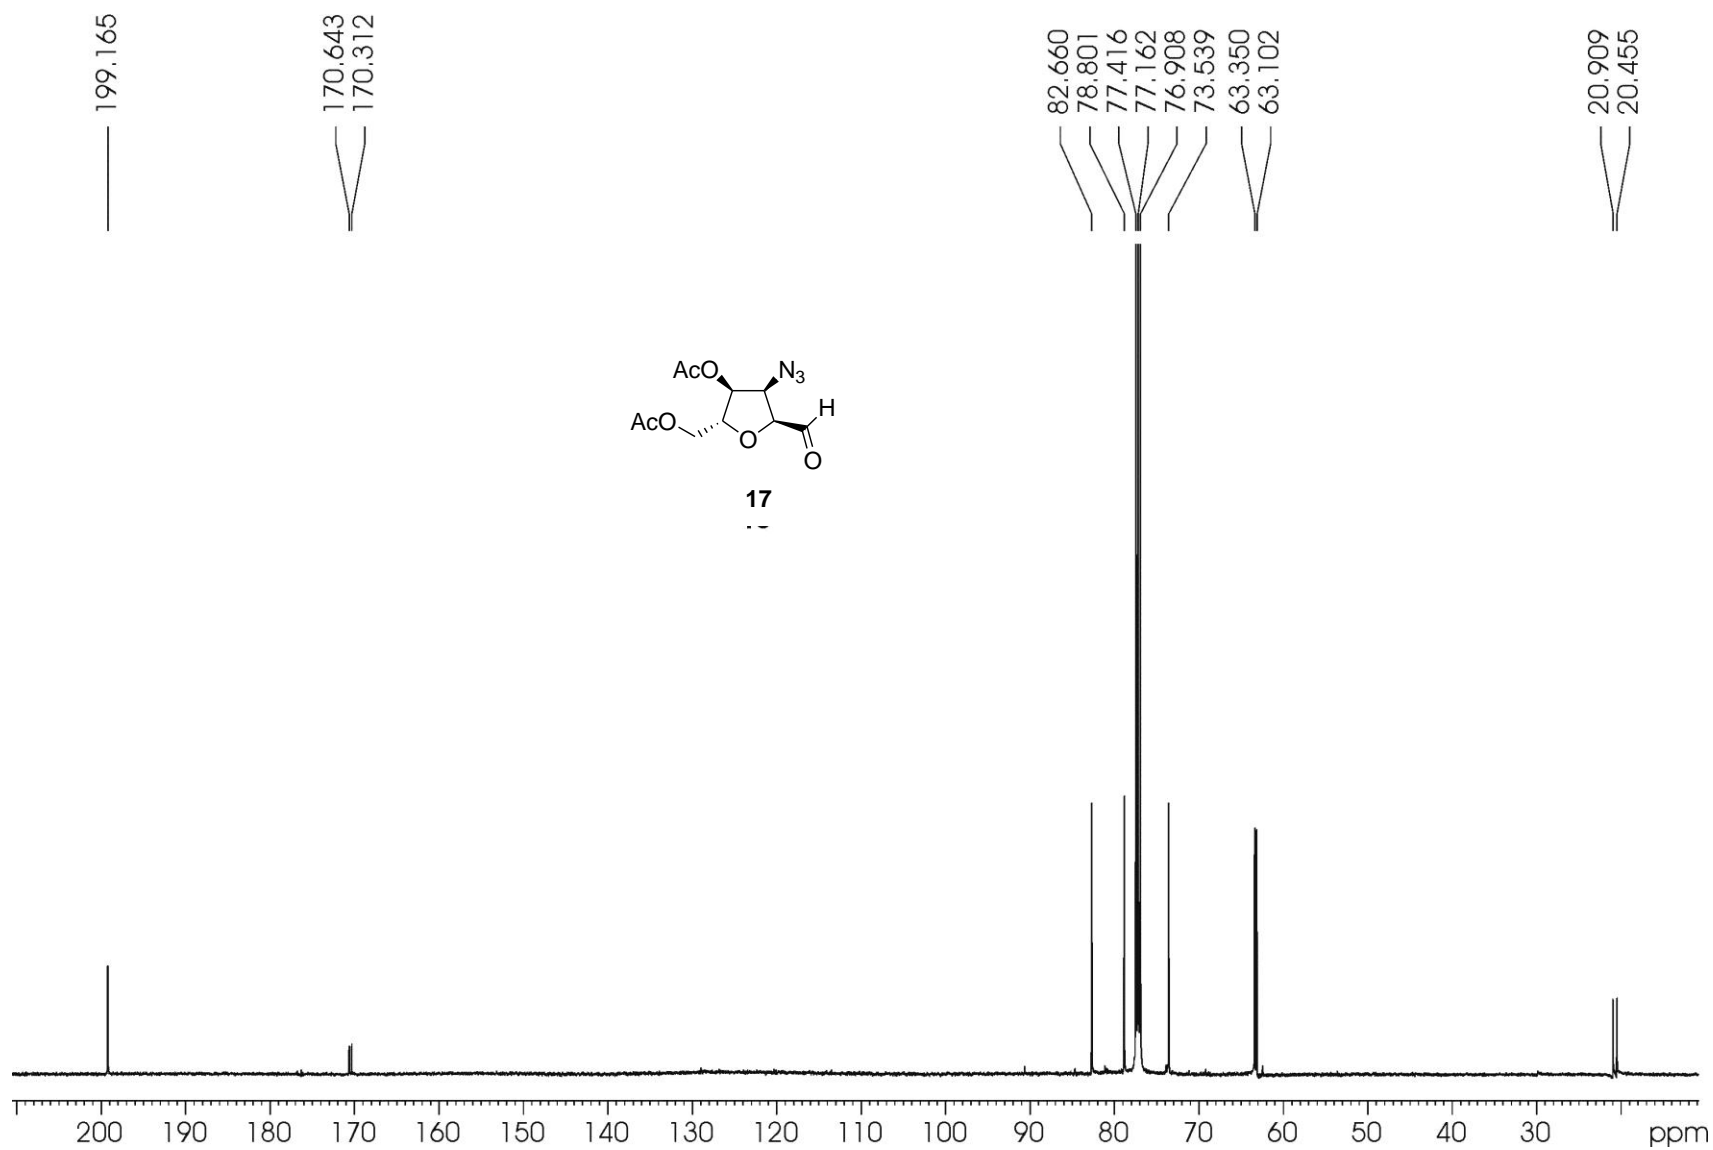

**4,6-Di-O-acetyl-2,5-anhydro-3-azido-3-deoxy-D-altrose (17)**

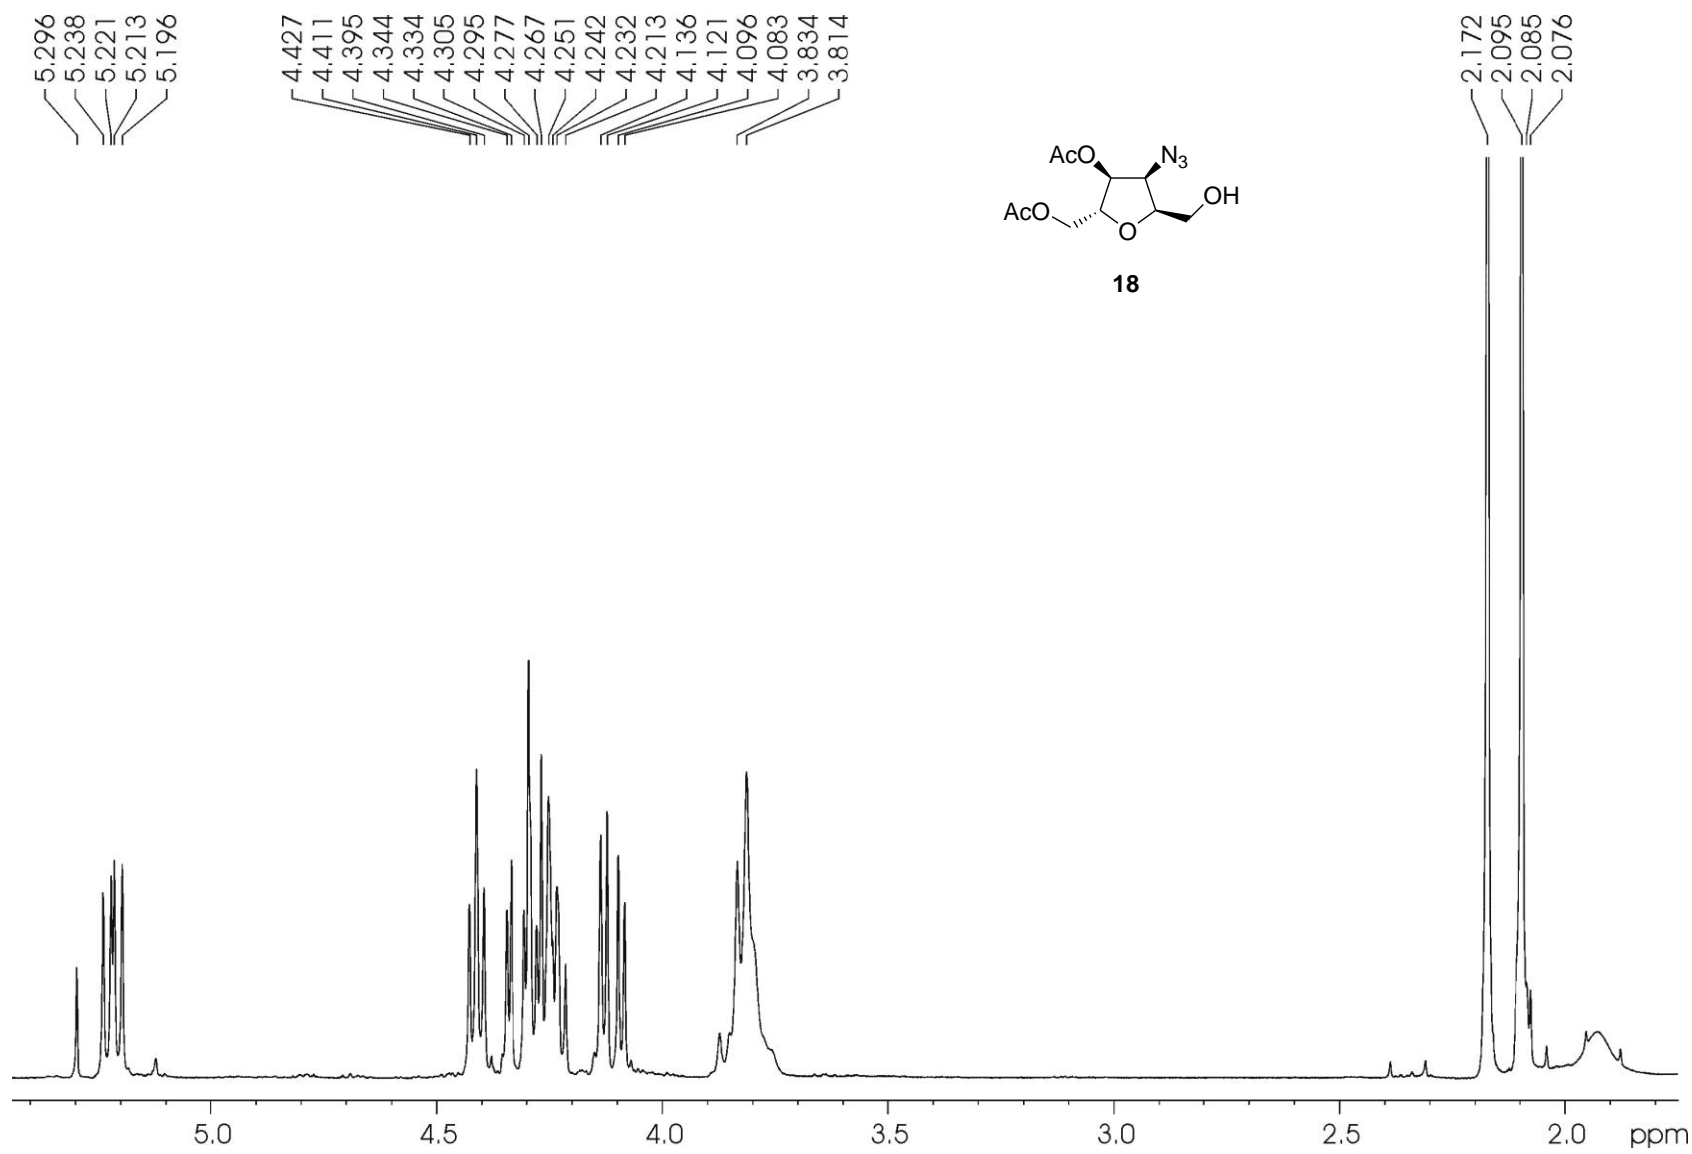

**4,6-Di-O-acetyl-2,5-anhydro-3-azido-3-deoxy-D-altritol (18)**

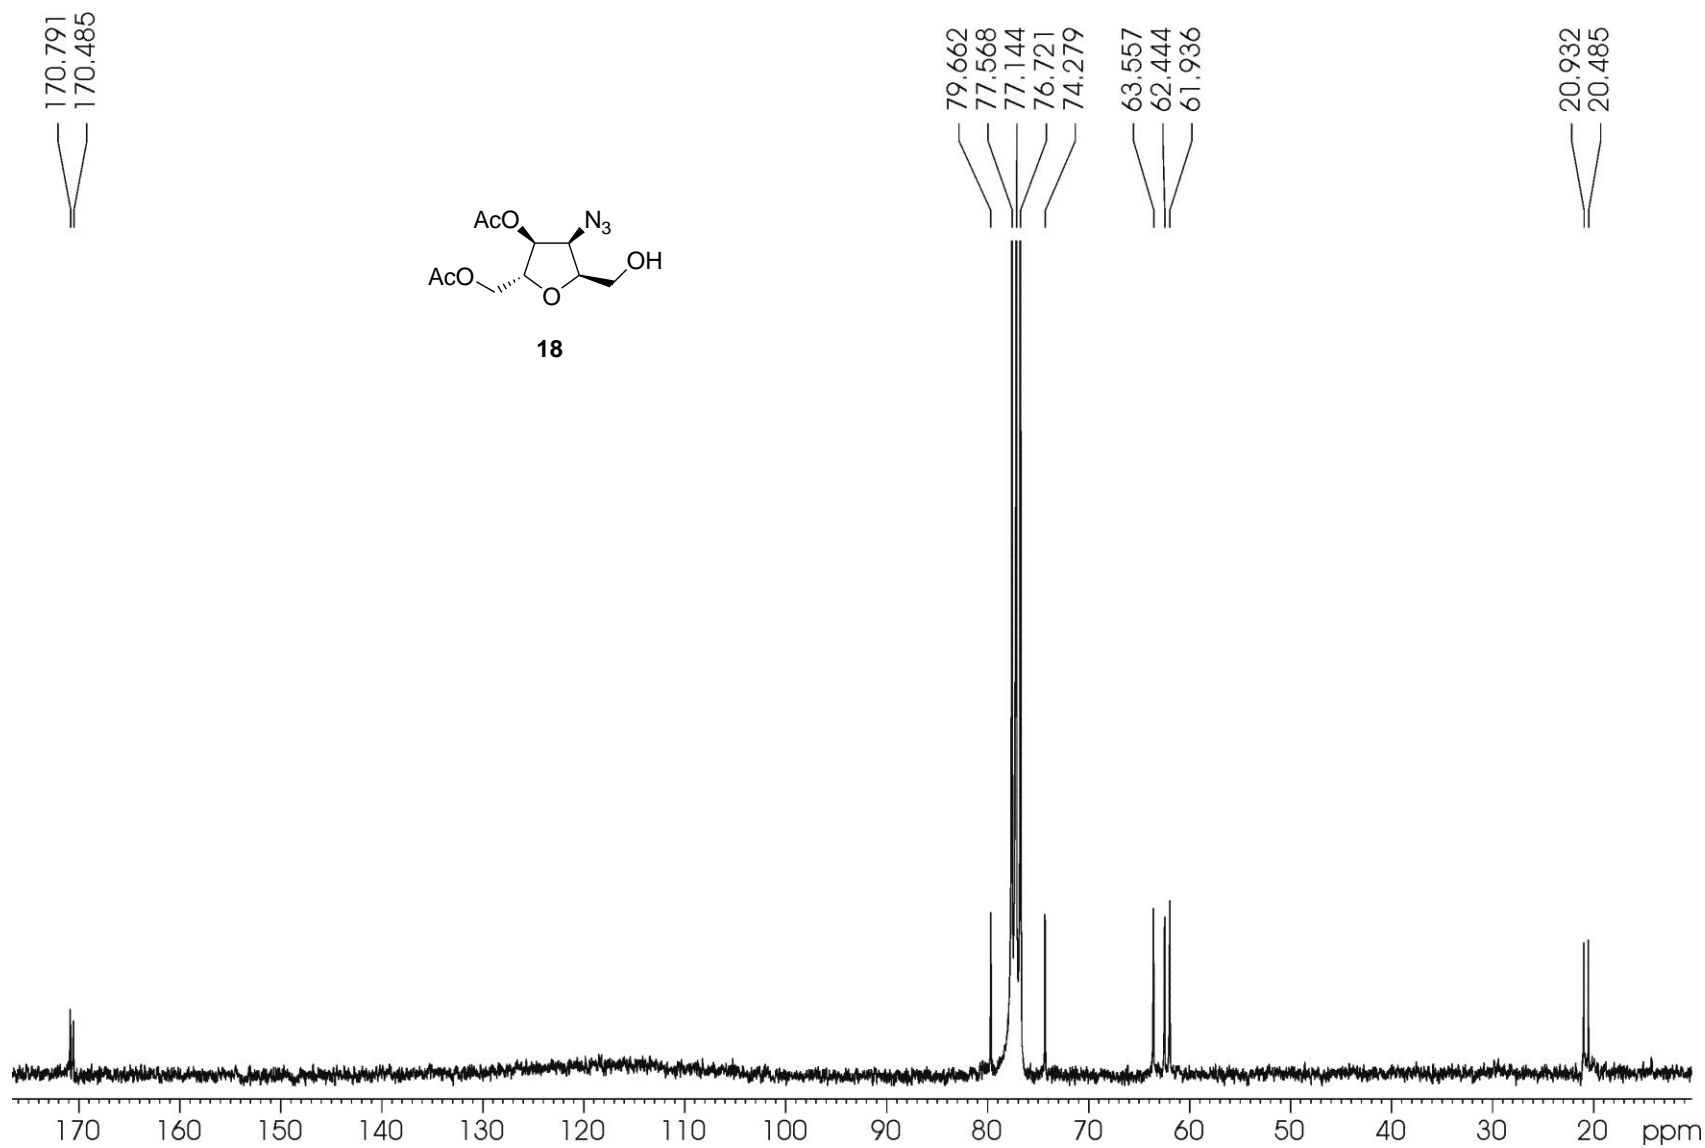

4,6-Di-O-acetyl-2,5-anhydro-3-azido-3-deoxy-D-altritol (18)



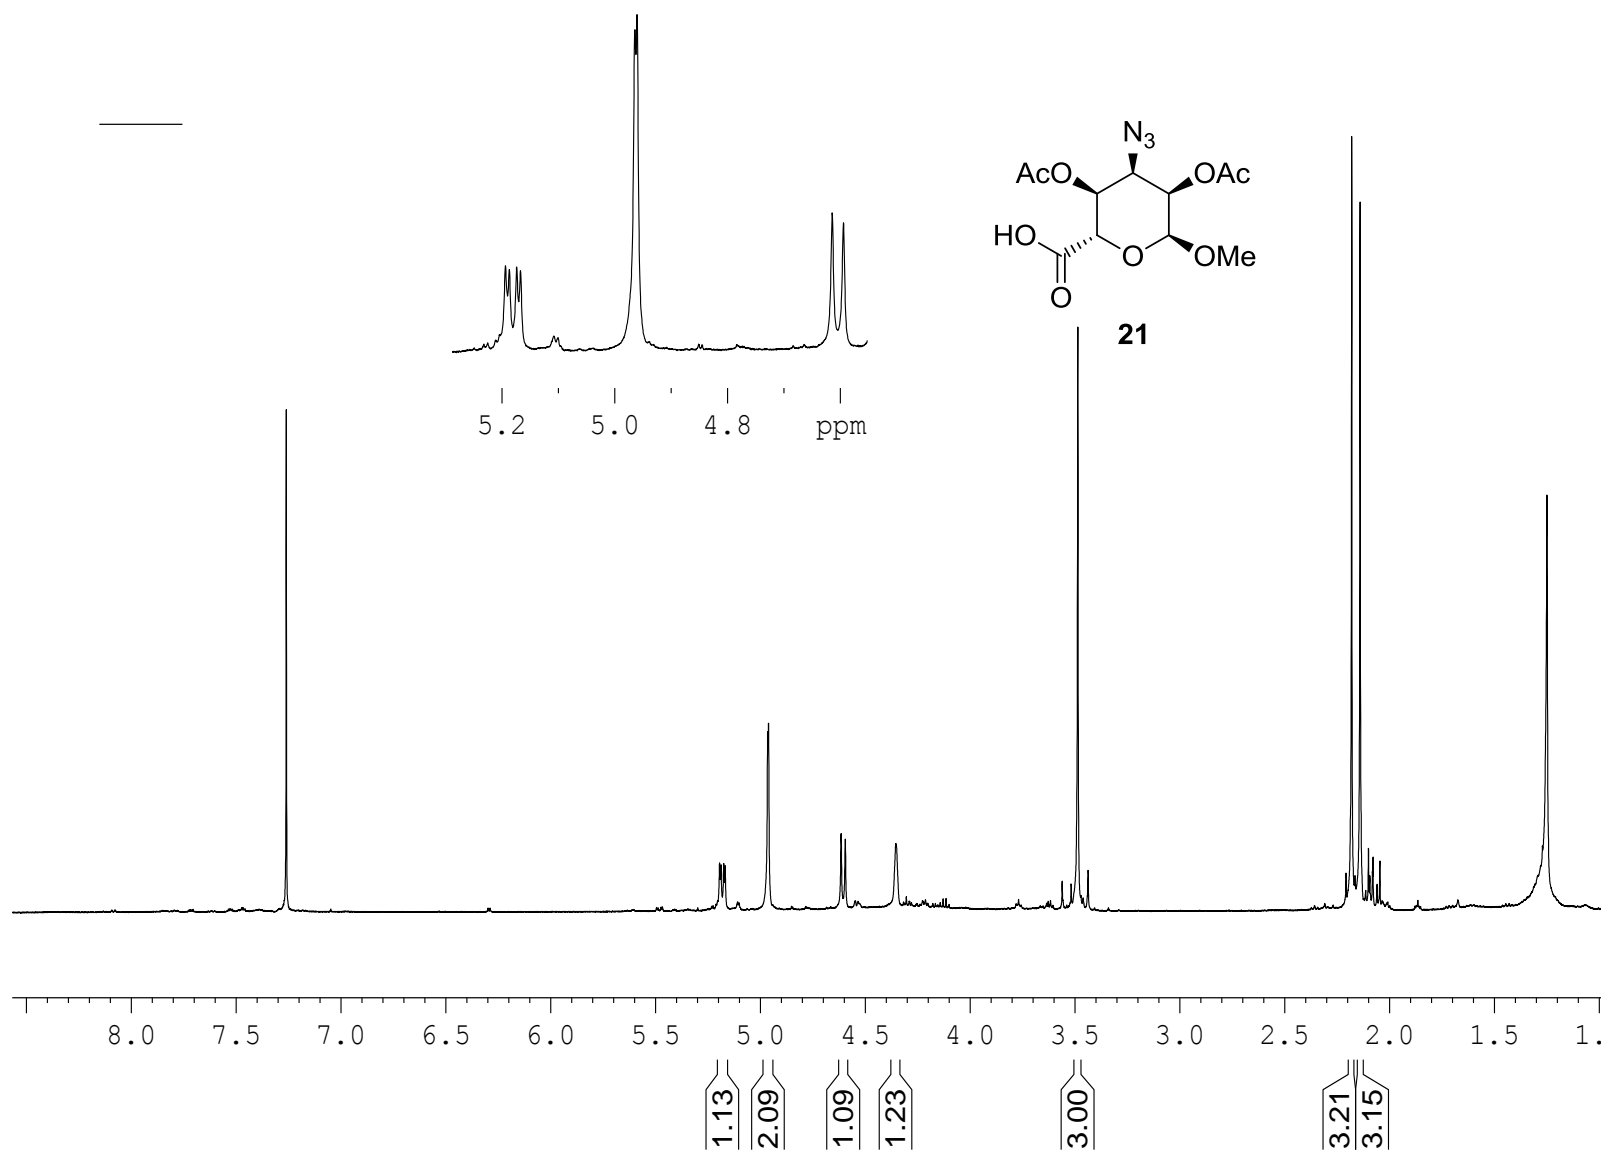

**Methyl 3-azido-2,4-di-O-acetyl-3-deoxy- $\alpha$ -D-allopyranosiduronic acid (21)**

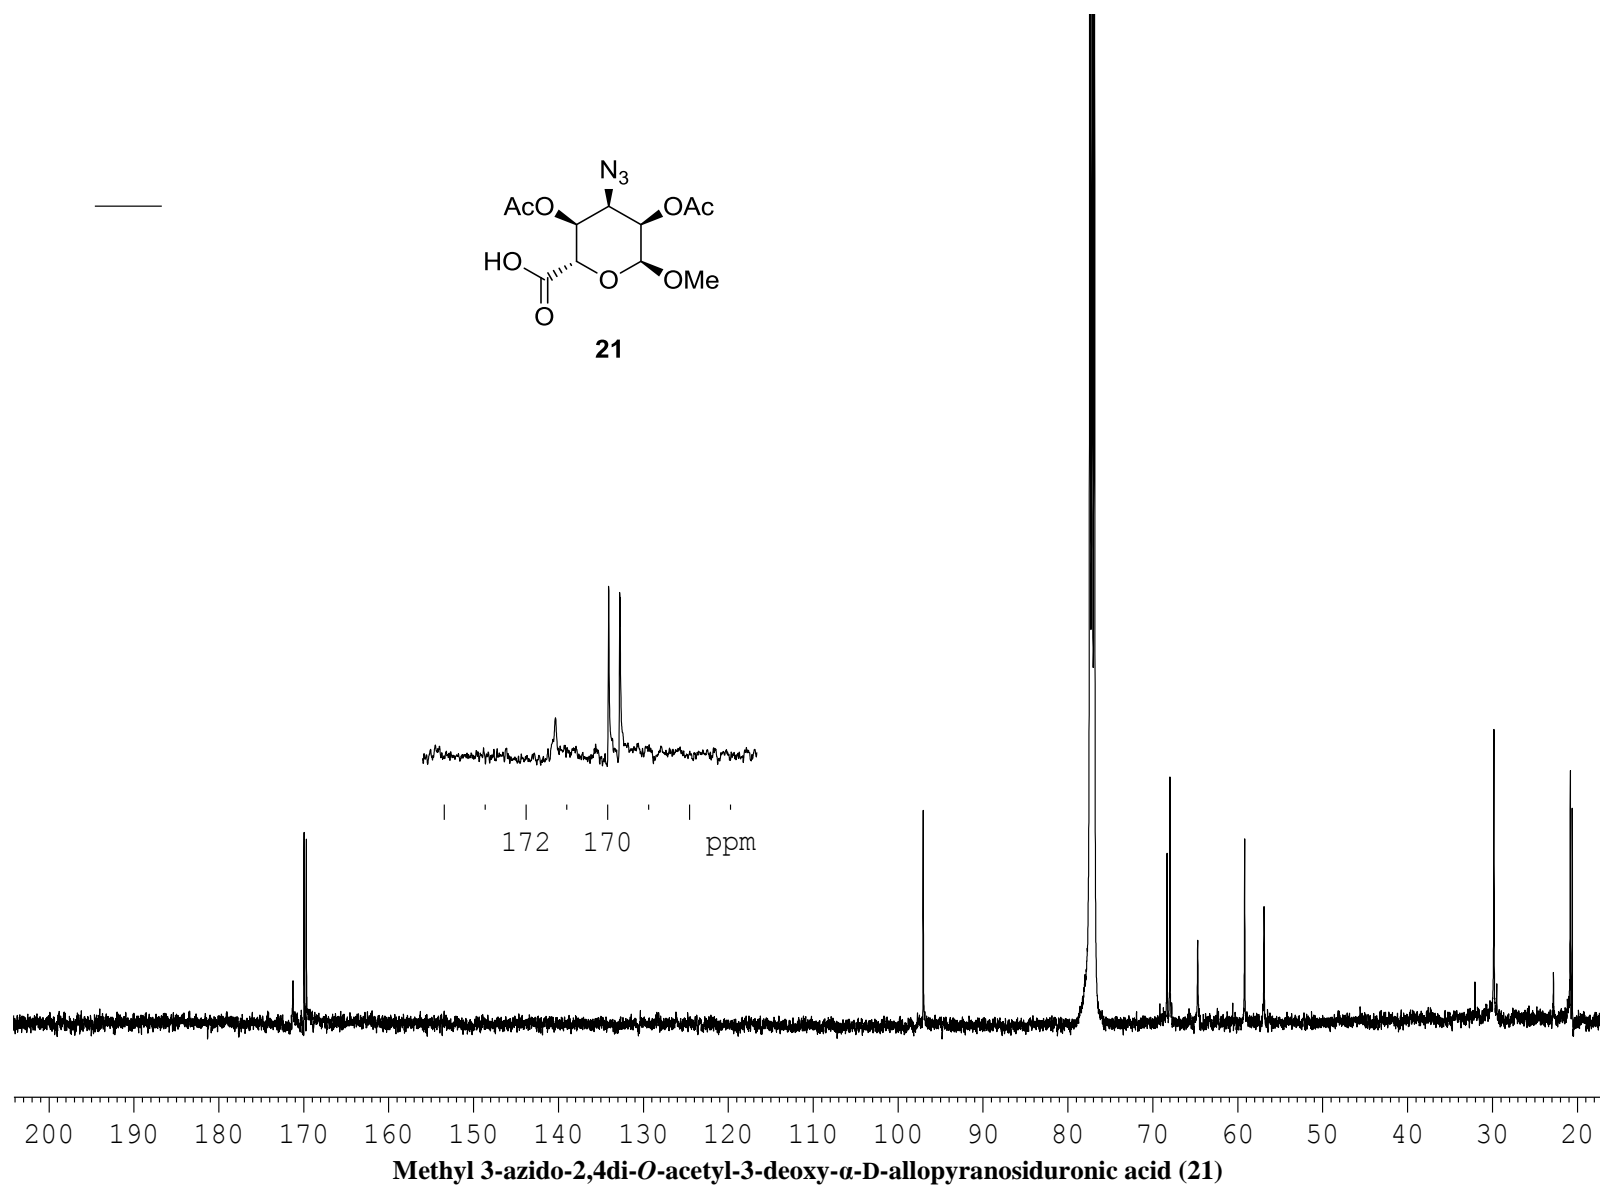

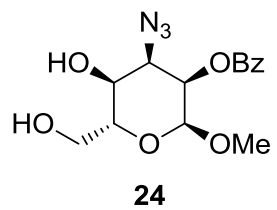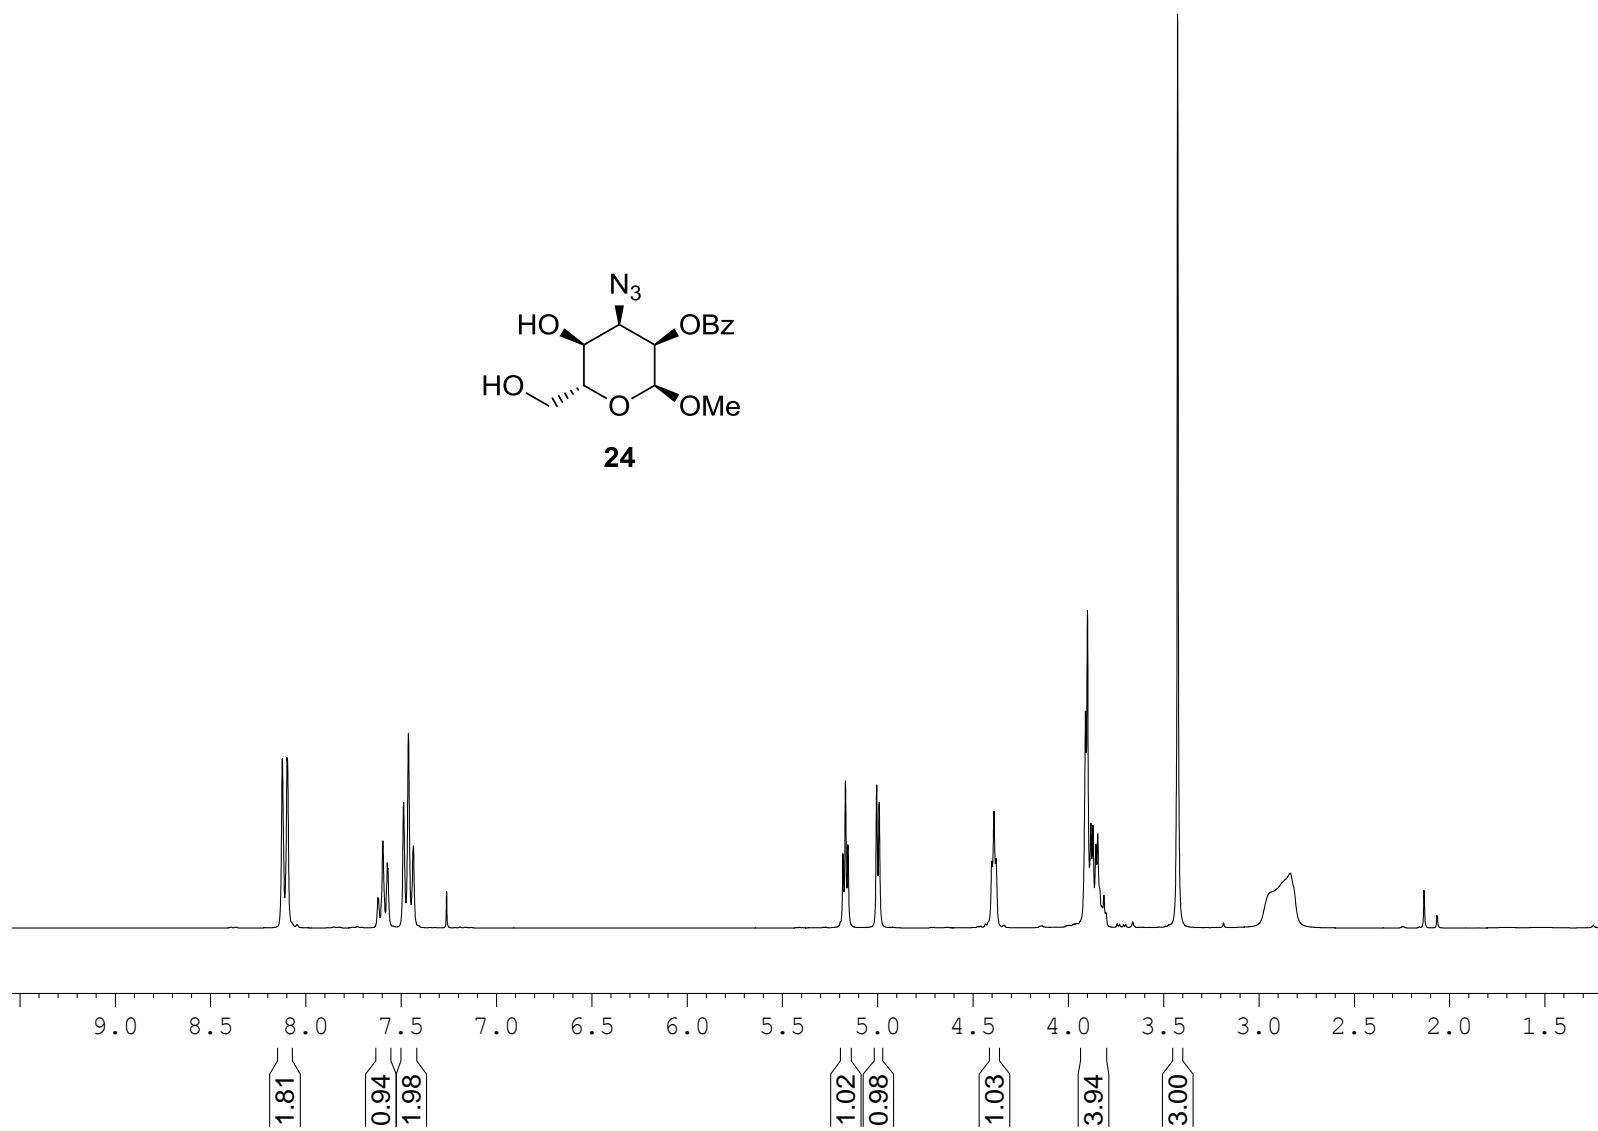

Methyl 3-azido-2-*O*-benzoyl-3-deoxy- $\alpha$ -D-allopyranoside (**24**)

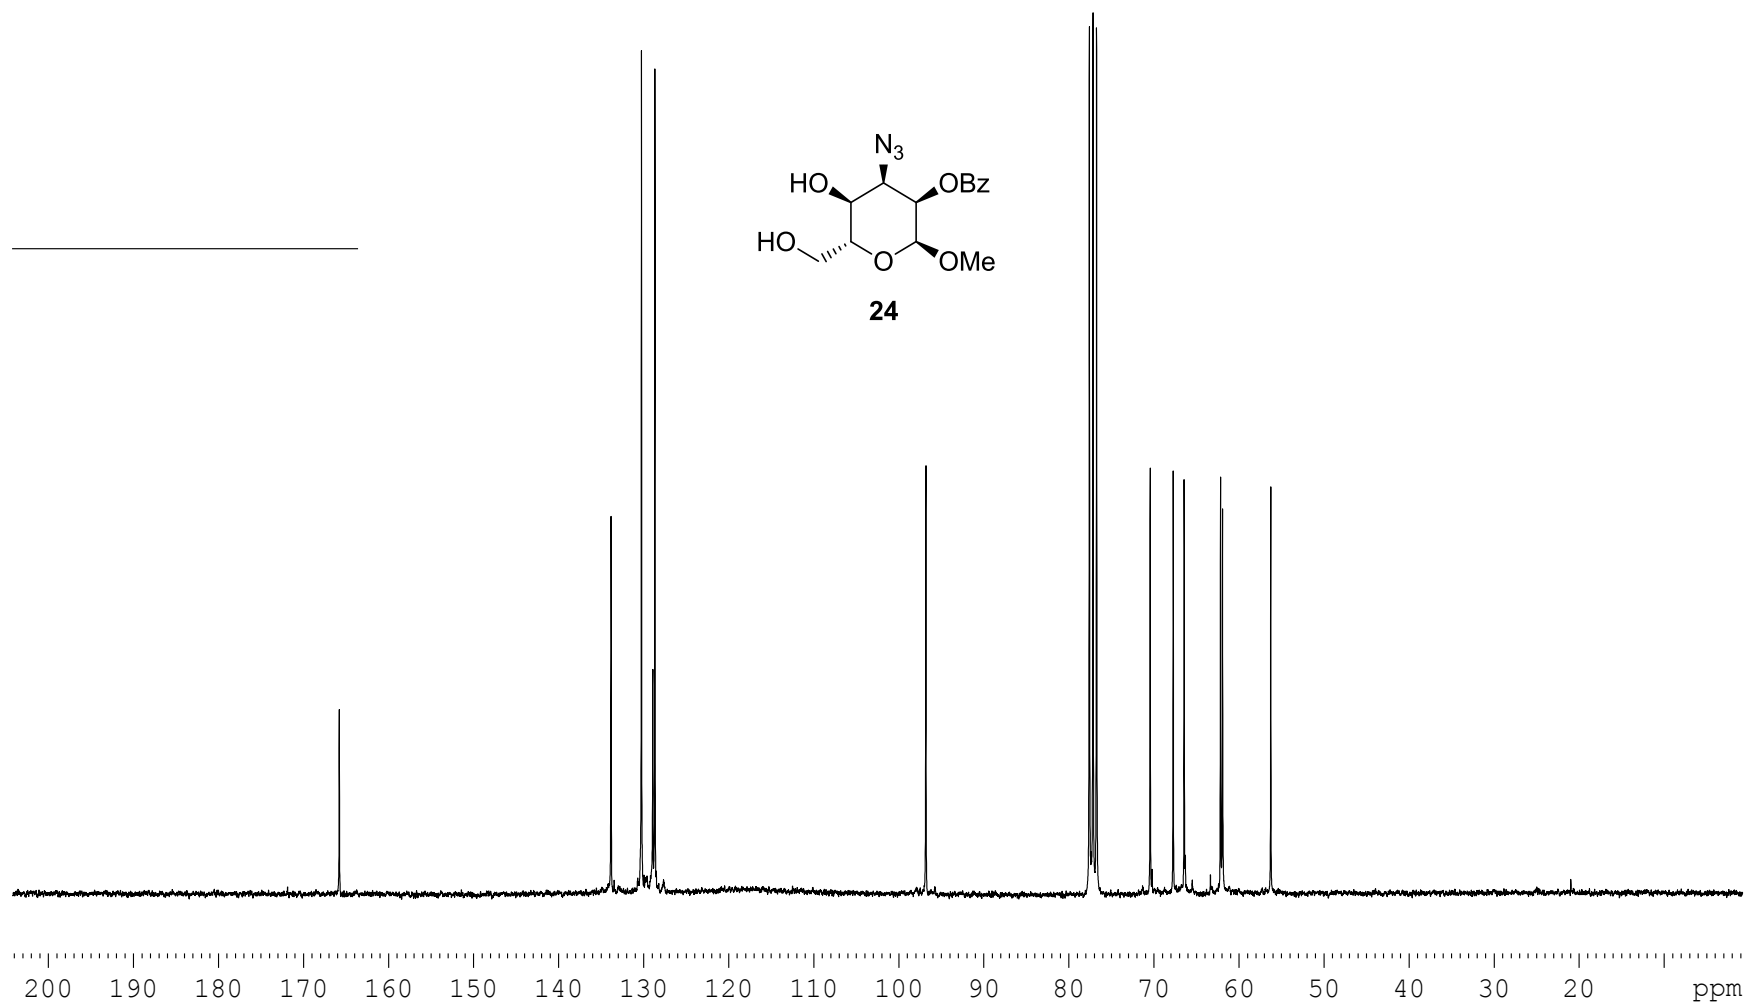

Methyl 3-azido-2-*O*-benzoyl-3-deoxy- $\alpha$ -D-allopyranoside (24)

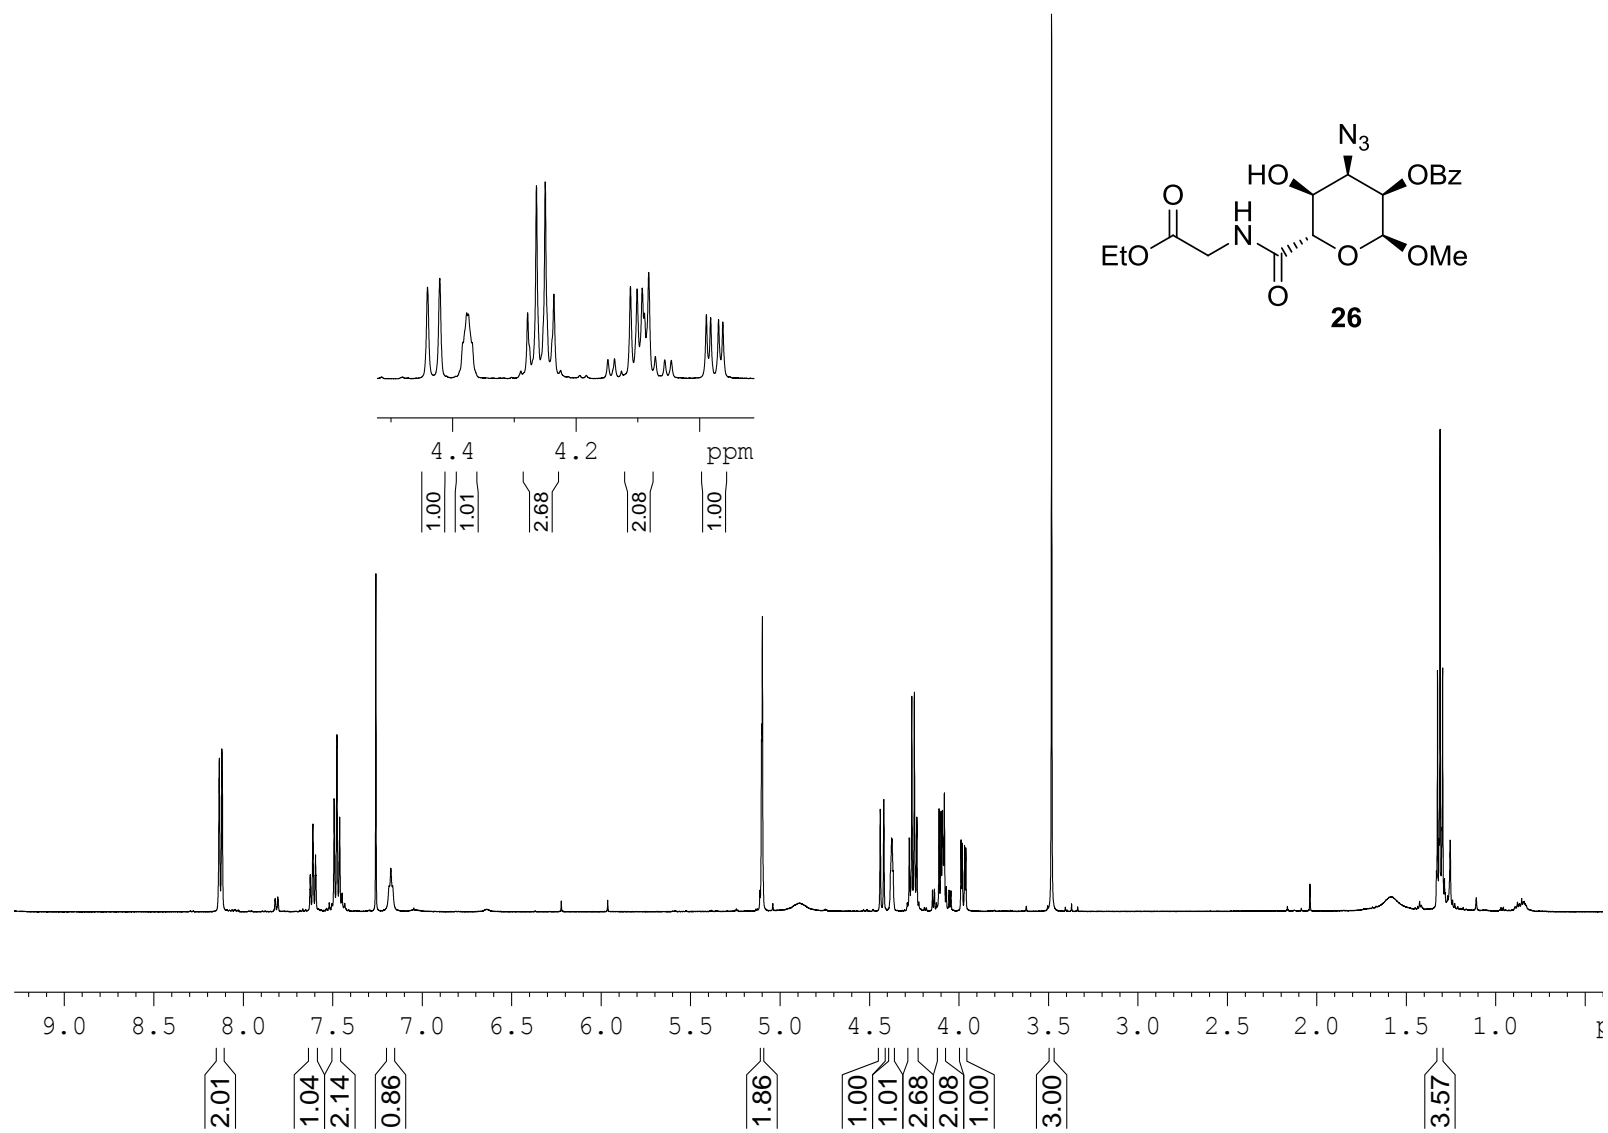

**Ethyl (methyl 3-azido-2-O-benzoyl-3-deoxy- $\alpha$ -D-allopyranosid)uronyl glycinate (26)**

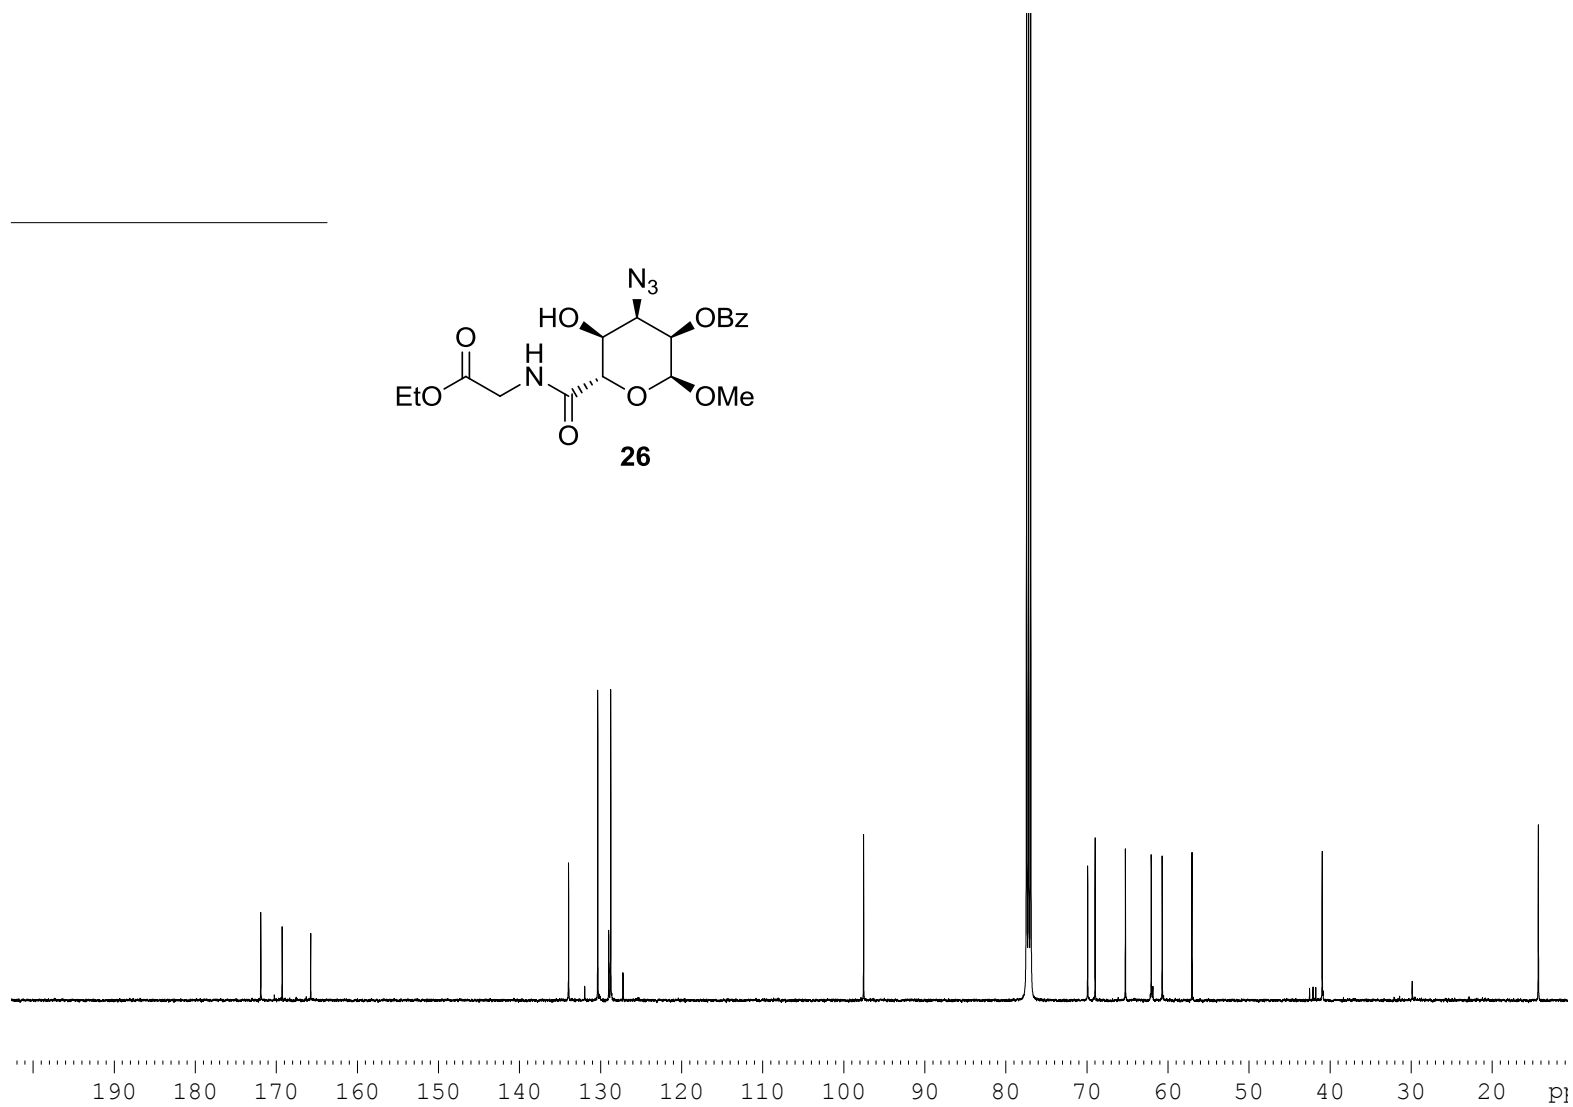

**Ethyl (methyl 3-azido-2-O-benzoyl-3-deoxy- $\alpha$ -D-allopyranosid)uronyl glycinat (26)**

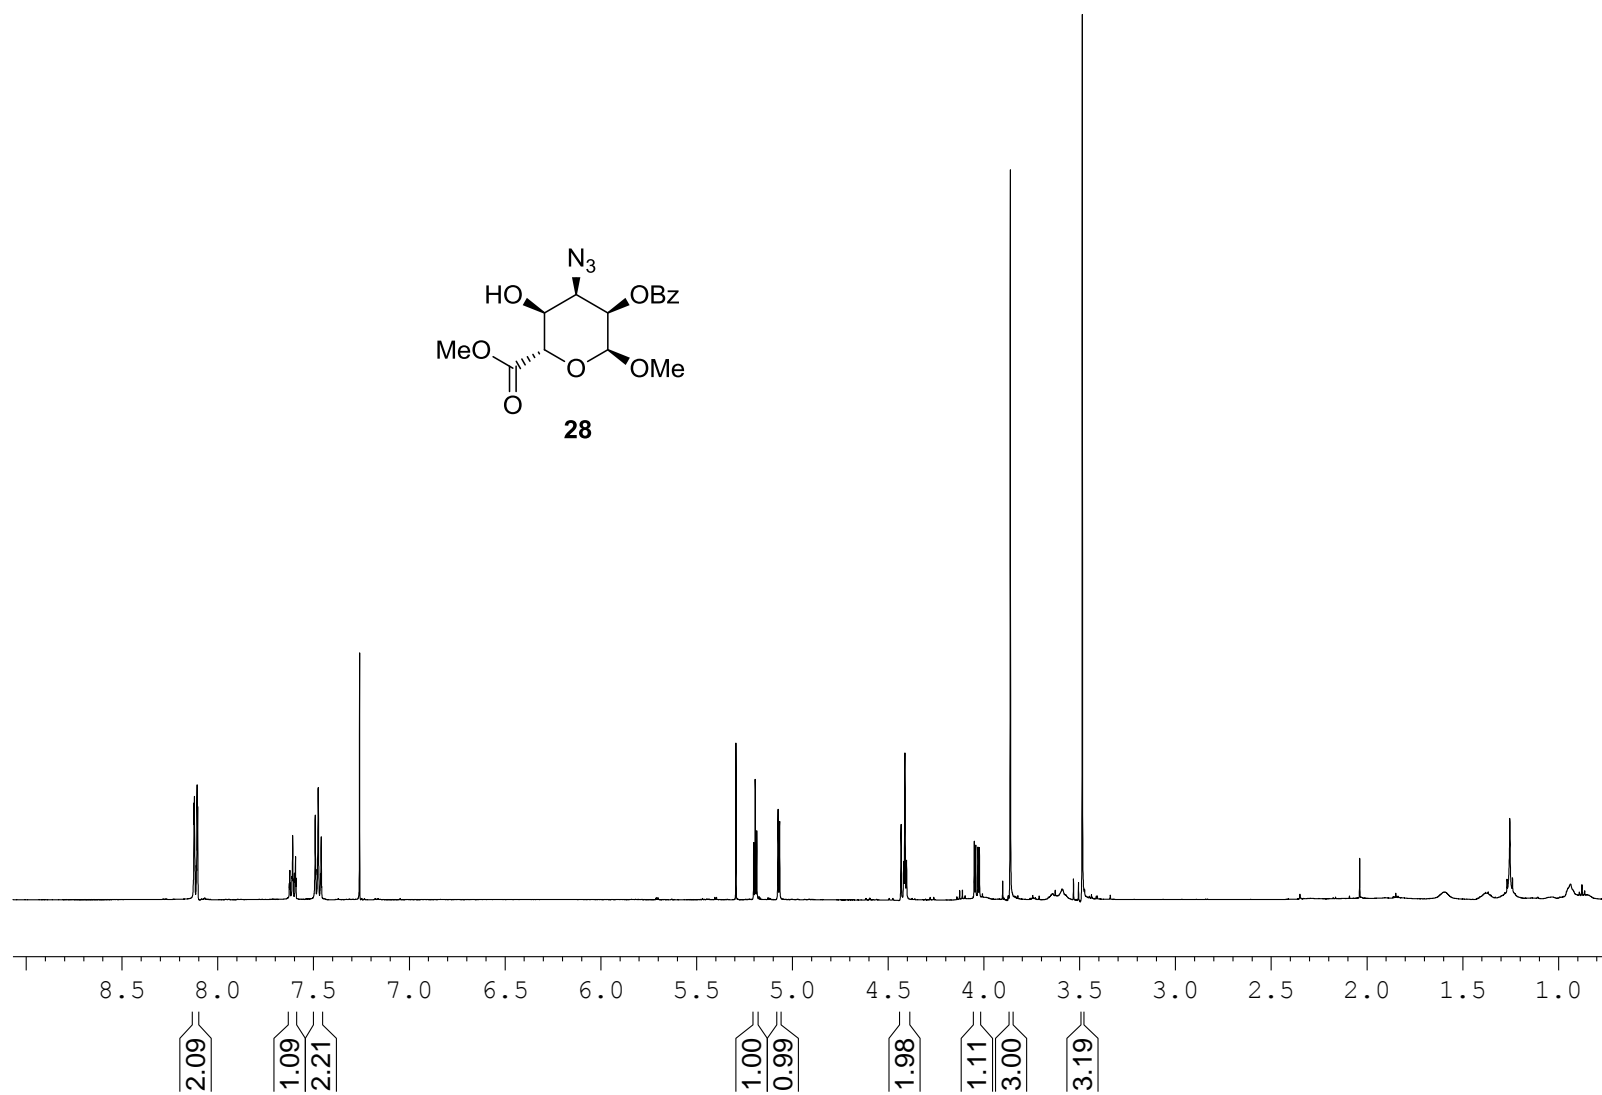

**Methyl (methyl 3-azido-2-*O*-benzoyl-3-deoxy- $\alpha$ -D-allopyranosid) uronate (28)**

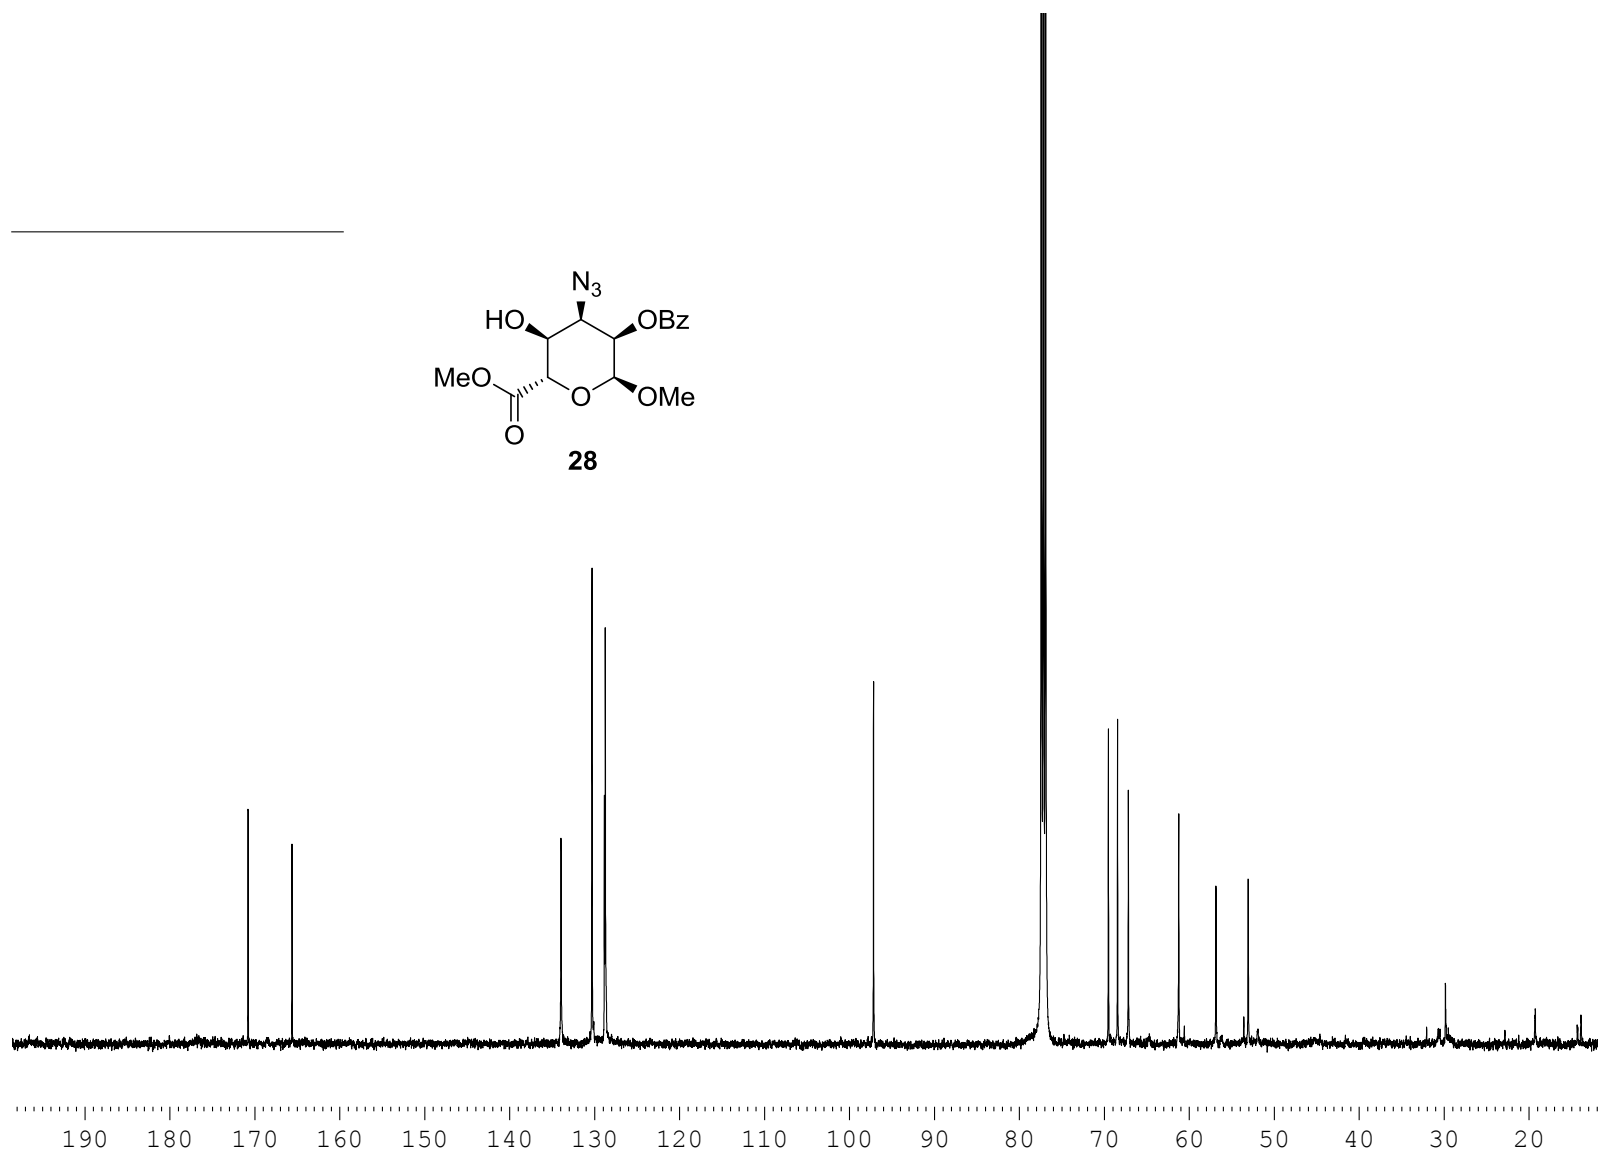

Methyl (methyl 3-azido-2-*O*-benzoyl-3-deoxy- $\alpha$ -D-allopyranosid)uronate (28)



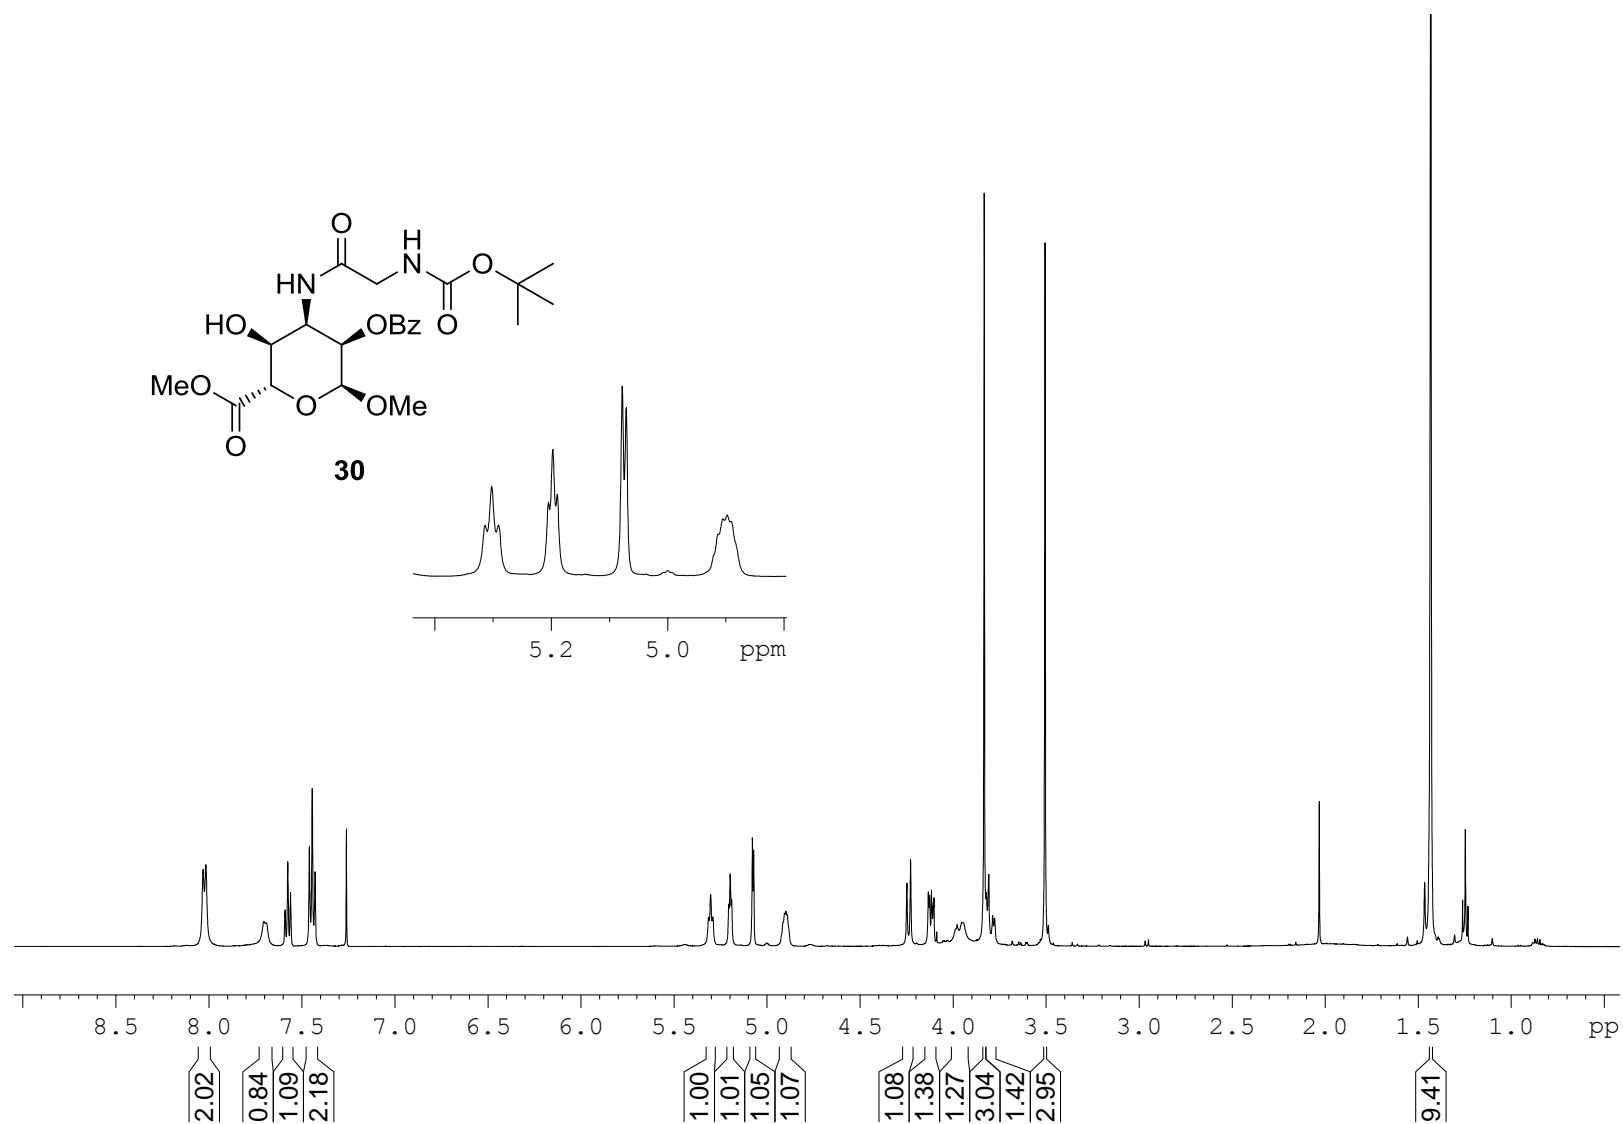

**Methyl [methyl 2-*O*-benzoyl-3-(*N*-*tert*-butoxycarbonyl-glycamido)-3-deoxy- $\alpha$ -D-allopyranosid]uronate (30)**

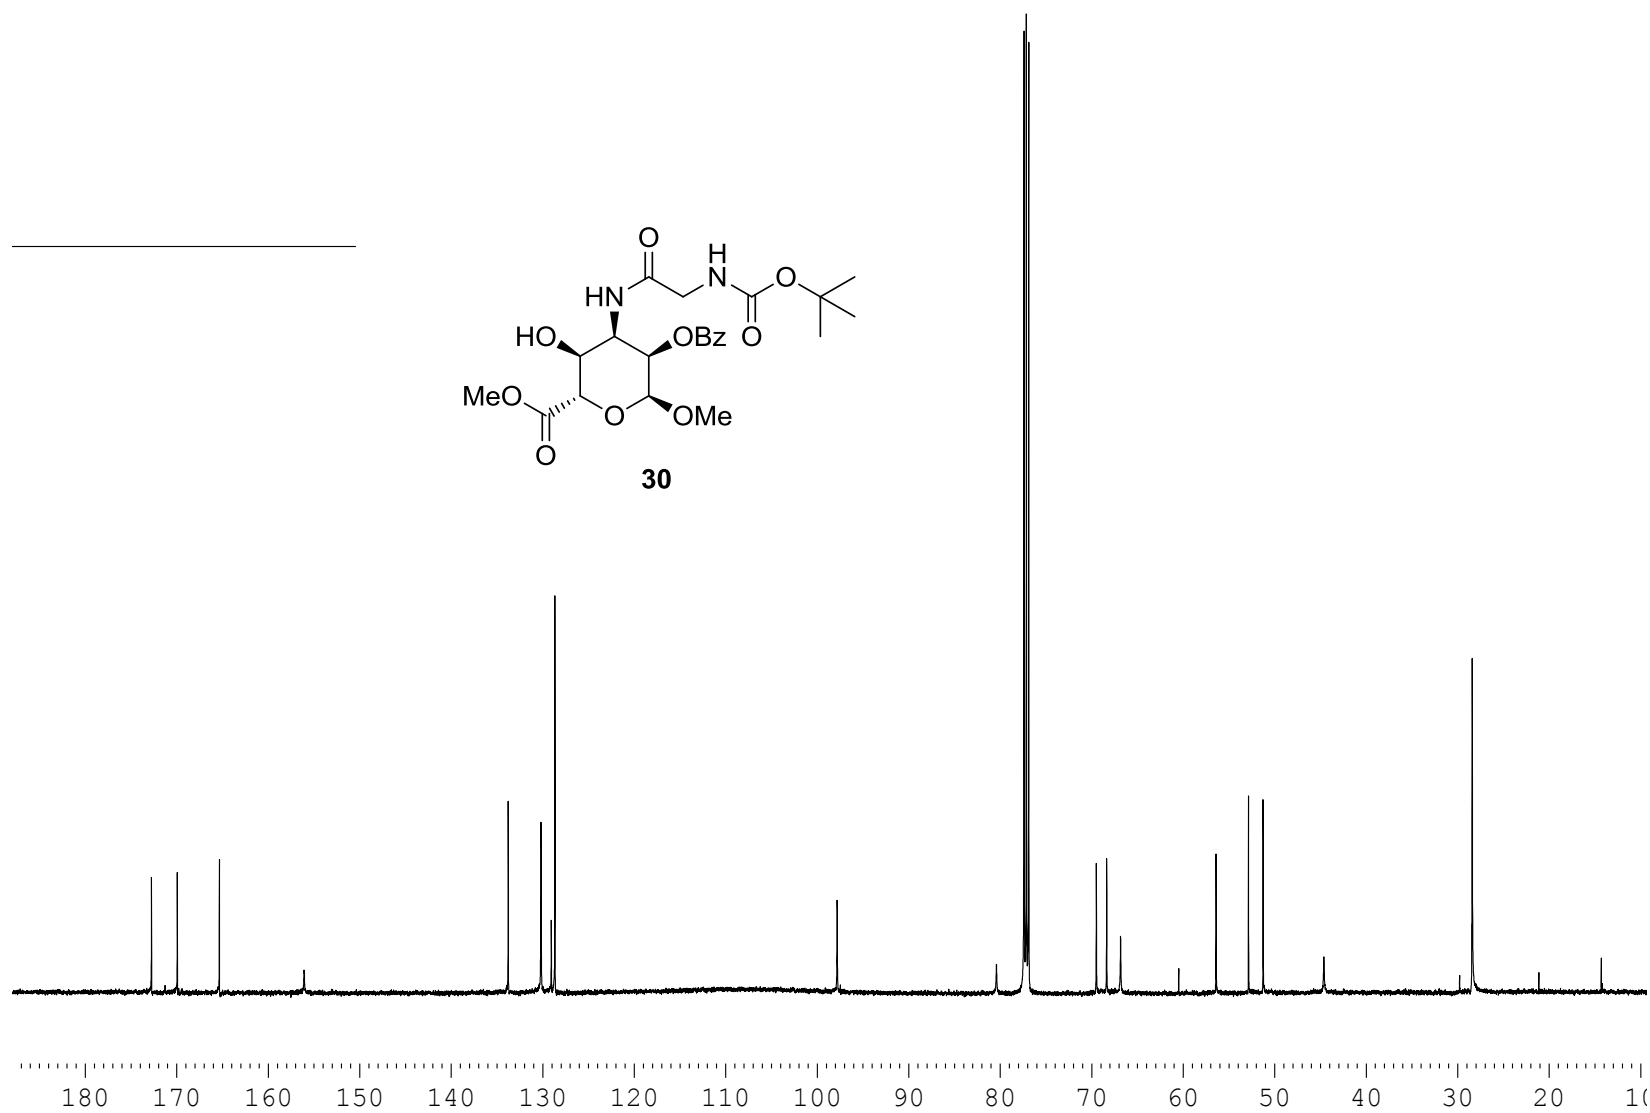

**Methyl [methyl 2-*O*-benzoyl-3-(*N*-*tert*-butoxycarbonyl-glycylamido)-3-deoxy- $\alpha$ -D-allopyranosid]uronate (30)**

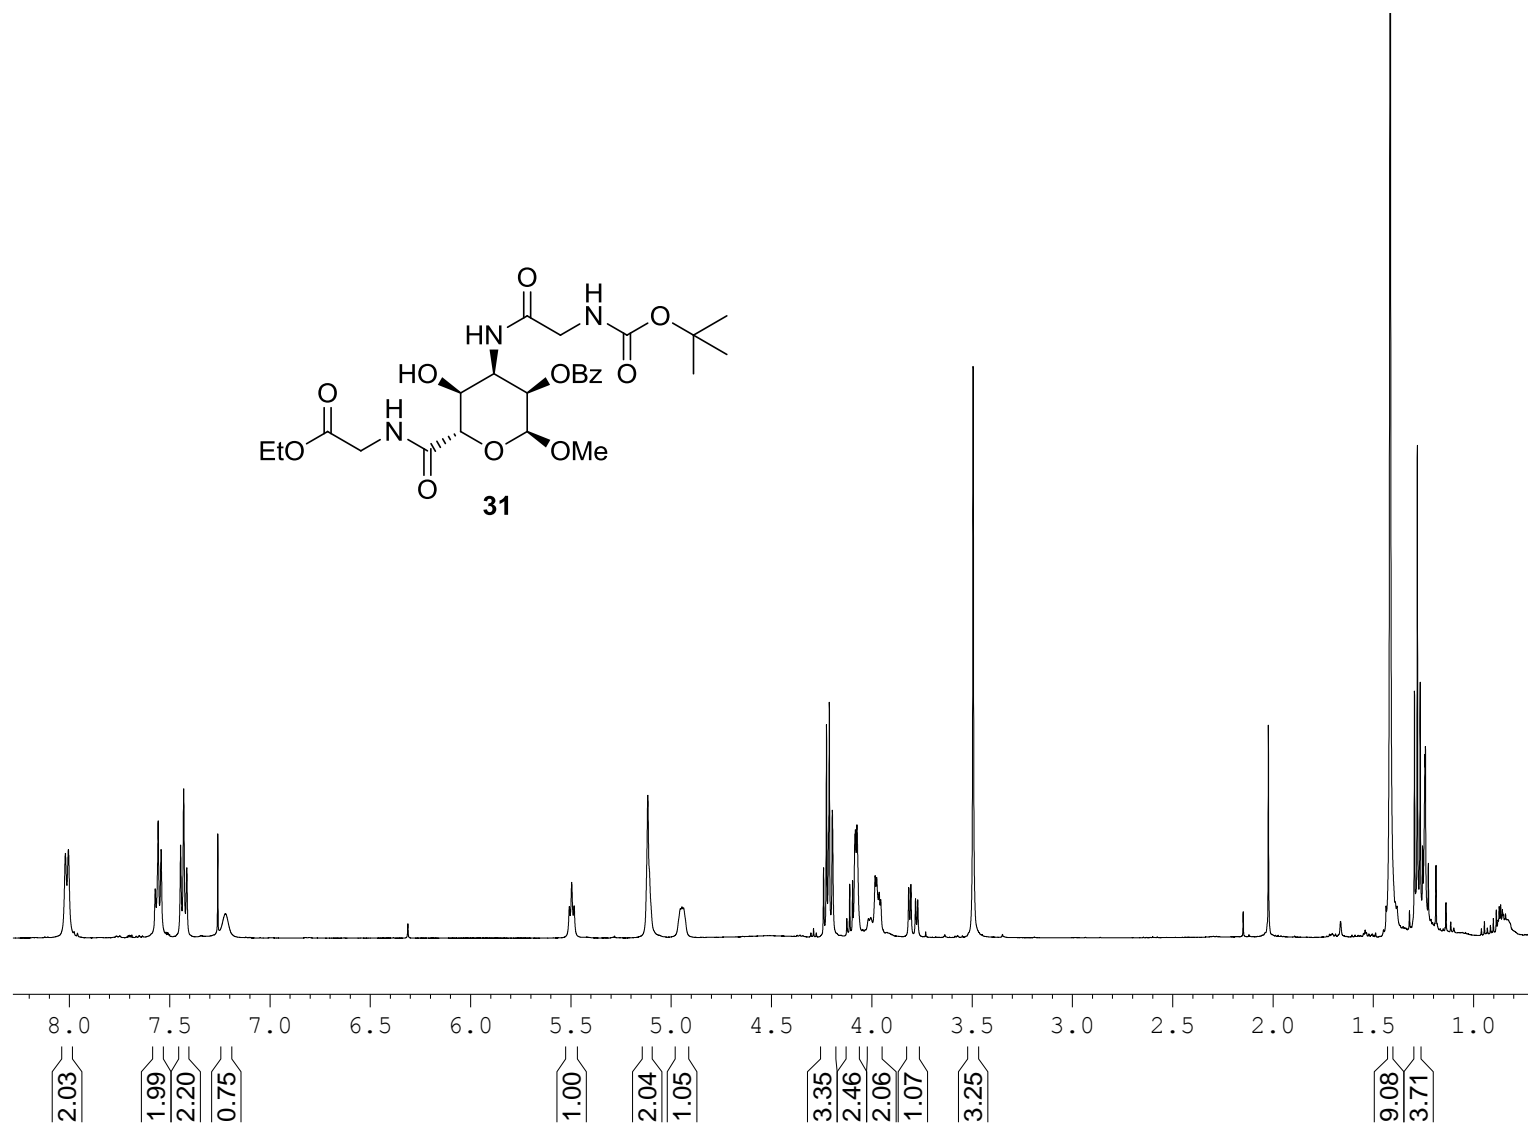

**Ethyl [methyl 2-*O*-benzoyl-3-(*N*-*tert*-butoxycarbonyl-glycylamido)-3-deoxy- $\alpha$ -D-allopyranosid]uronyl-glycinate (31)**

S35

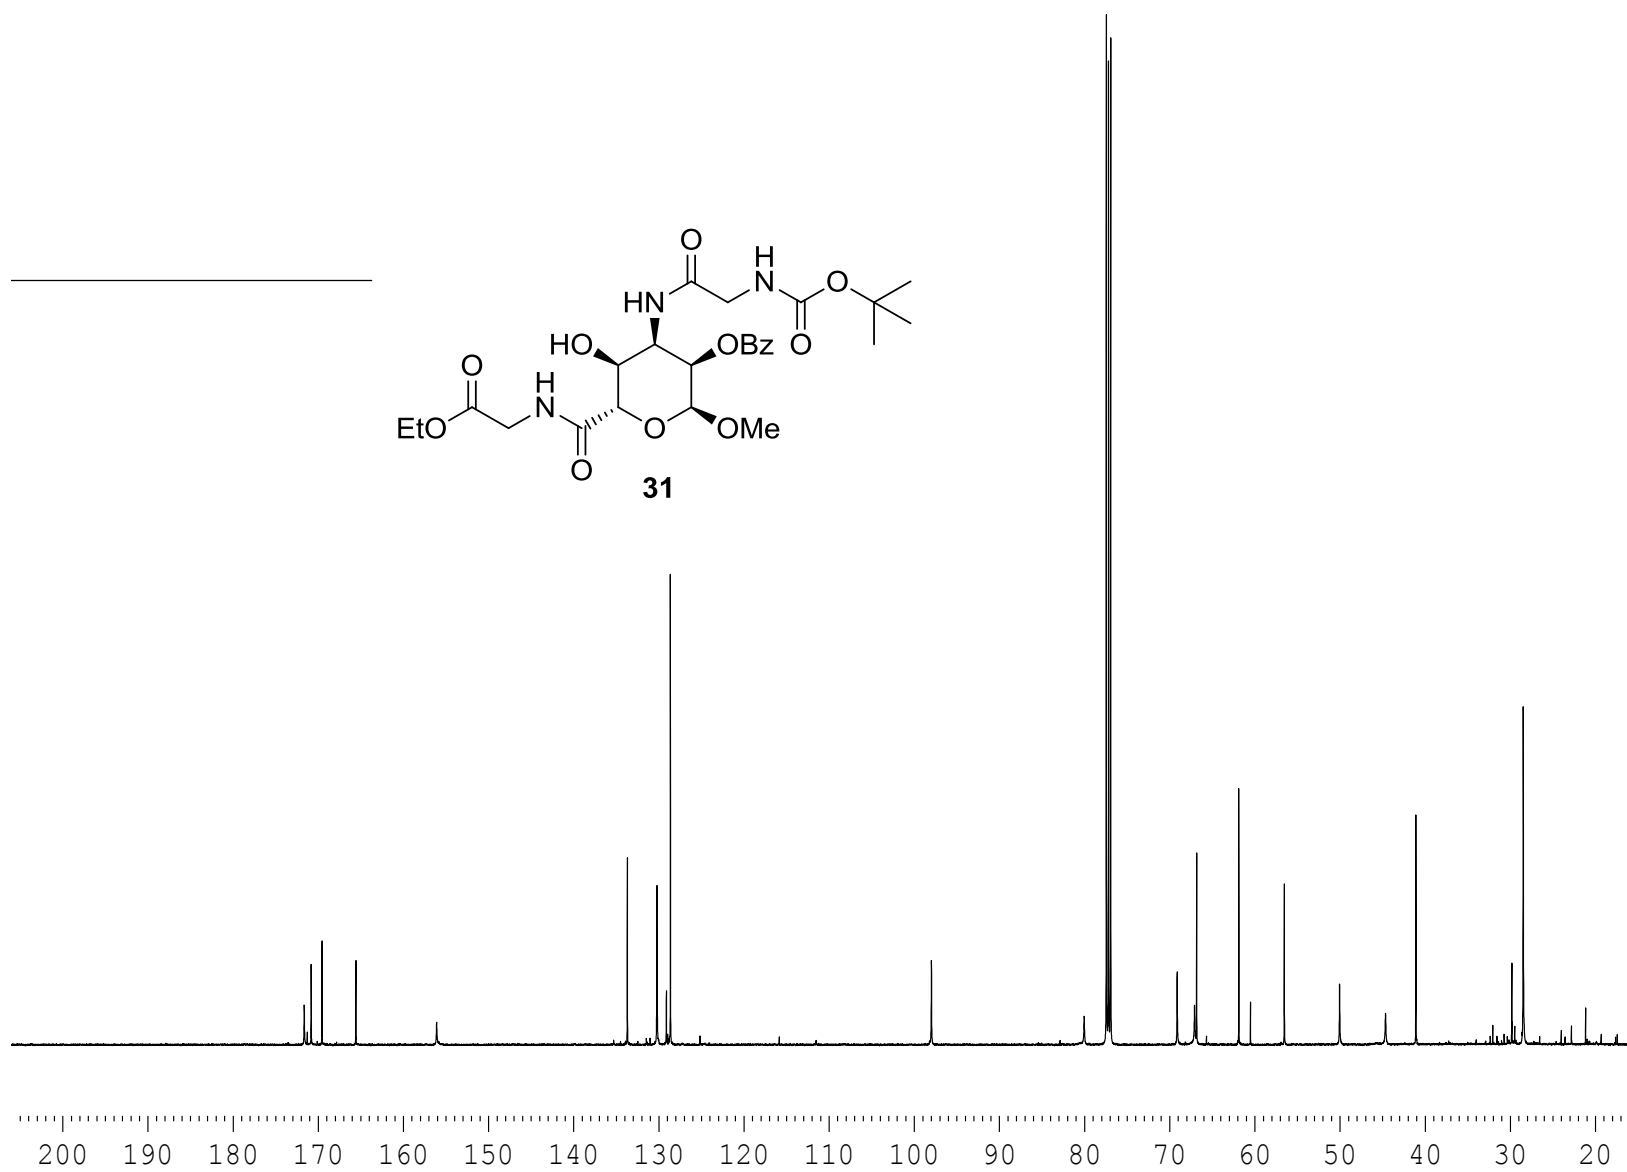

**Ethyl [methyl 2-O-benzoyl-3-(N-tert-butoxycarbonyl-glycylamido)-3-deoxy- $\alpha$ -D-allopyranosid]uronyl-glycinate (31)**
